# Supplementary material for: Anticancer Effects and Molecular Action of 7-α-Hydroxyfrullanolide in G2/M-Phase Arrest and Apoptosis in Triple Negative Breast Cancer Cells
Source: MDPI journal article supplement (doi:10.3390/molecules27020407), 2022-01-09

**Anticancer Effects and Molecular Action of 7- $\alpha$ -Hydroxyfrullanolide in G2/M-Phase Arrest and Apoptosis in Triple Negative Breast Cancer Cells**

**Siriphorn Chimplee<sup>1</sup>, Sittiruk Roytrakul<sup>2</sup>, Suchada Sukrong<sup>3</sup>, Theera Srisawat<sup>4,5</sup>, Potchanapond Graidist<sup>1</sup>, Kanyanatt Kanokwiroon<sup>1\*</sup>**

<sup>1</sup>Department of Biomedical Sciences and Biomedical Engineering, Faculty of Medicine, Prince of Songkla University, Hat Yai, Songkhla, 90110, Thailand

<sup>2</sup>Functional Ingredients and Food Innovation Research Group, National Center for Genetic Engineering and Biotechnology (BIOTEC), National Science and Technology Development Agency (NSTDA), Pathum Thani, 12120, Thailand

<sup>3</sup>Research Unit of DNA Barcoding of Thai Medicinal Plants, Department of Pharmacognosy and Pharmaceutical Botany, Faculty of Pharmaceutical Sciences, Chulalongkorn University, Bangkok, 10330, Thailand

<sup>4</sup>Faculty of Science and Industrial Technology, Prince of Songkla University, Surat Thani Campus, Surat Thani, 84000, Thailand

<sup>5</sup>Faculty of Innovative Agriculture and Fisheries, Prince of Songkla University, Surat Thani Campus, Surat Thani, 84000, Thailand

\*Correspondence and requests for materials should be addressed to K.K.

(Email: kanyanatt.k@psu.ac.th)

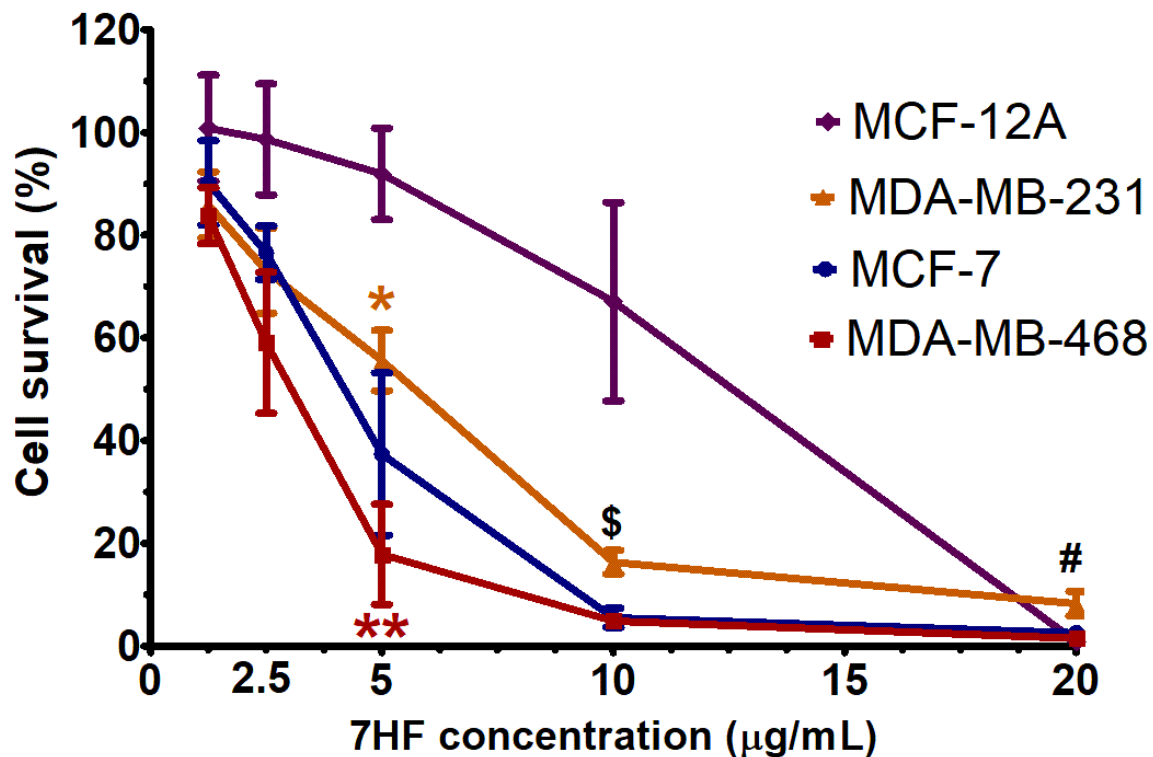

**Supplementary Materials Figure S1. 7HF concentration-response curve of human breast cancer and normal cells**

The cytotoxicity of 7HF on human breast cancer cells (MCF-7, MDA-MB-468, and MDA-MB-231) and normal cells (MCF-12A) at 72 h. Mean values of cell survivals were derived from two-three independent experiments. Differences were statistically analysed using one-way ANOVA and Dunnett's multiple comparison test. \* $p < 0.05$  compared to untreated, \*\* $p < 0.01$  compared to untreated, \$ $p < 0.01$  7HF (at 10 μg/mL) of all breast cancer cell lines compared to their untreated, and # $p < 0.01$  7HF (at 20 μg/mL) of all cell lines compared to their untreated.

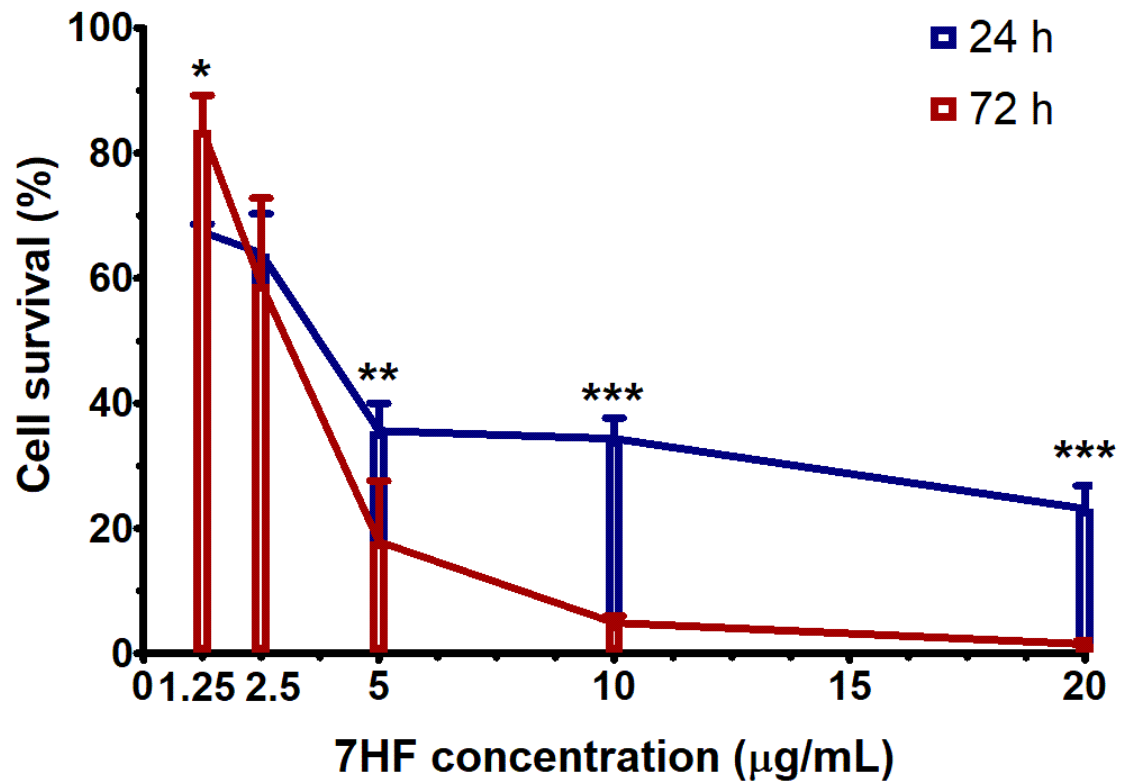

**Supplementary Materials Figure S2.** 7HF concentration-response curve of MDA-MB-468 cells for 24 h and 72 h. Differences were statistically analysed using two-way ANOVA and Bonferroni posttests comparisons. \*,  $p < 0.05$ , \*\* $p < 0.01$ , and \*\*\*  $p < 0.001$  at 24 h compared to at 72 h.

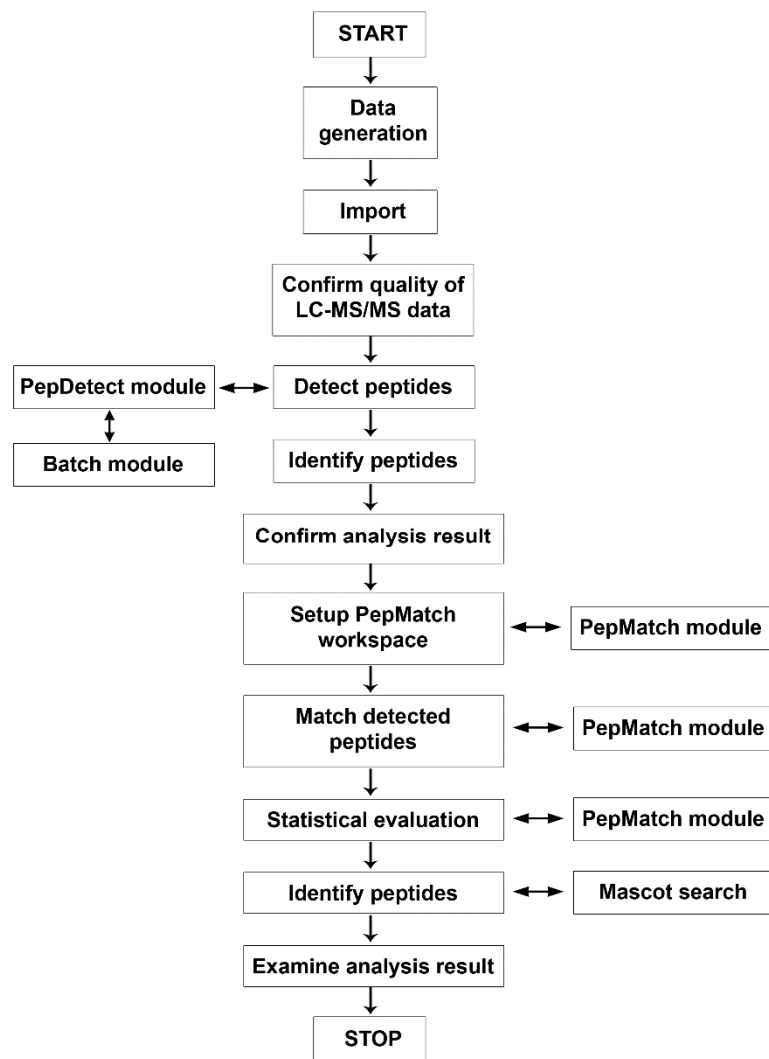

**Supplementary Materials Figure S3. Proteomic analysis workflow in this study**

DeCyder MS 2.0 Differential Analysis Software and tools (PepDetect, Batch, and PepMatch) were used for proteome identification.

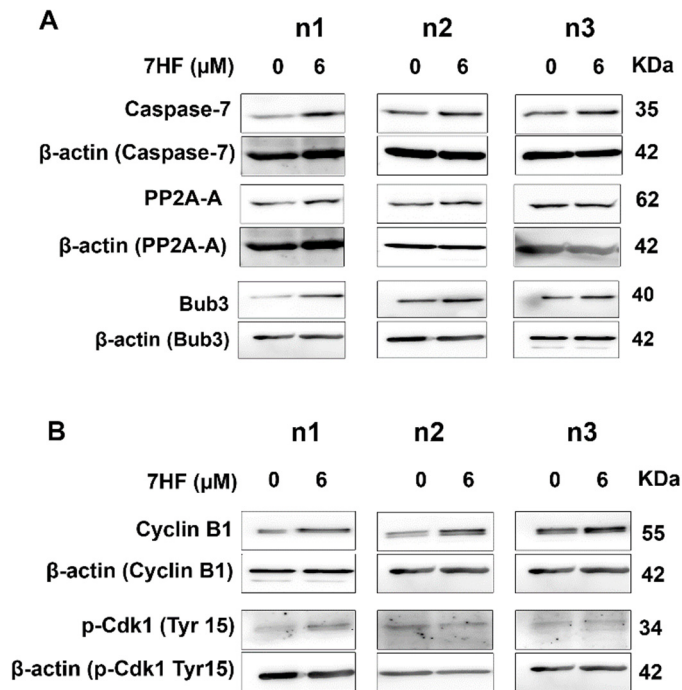

**Supplementary Materials Figure S4. Protein expressions were evaluated using Western blotting at 6  $\mu$ M 7HF for 24 h. (A) PP2A-A, Bub3, and caspase-7 expression was validated using proteomics. (B) Cyclin B1 and phosphorylated Cdk1 (p-Cdk1) (Tyr15) expression after 7 HF treatment. These proteins were depicted along with their  $\beta$ -actin. The results were performed in three independent experiments (n1- n3) . The experiment n1-n3 used for calculation of band intensity (or relative expression) from indicated protein and  $\beta$ -actin in Figure 4C-D (page 10). The full original Western blot images show in page 3-7 in this revision as follows: caspase-7, PP2A-A, Bub3, Cyclin B1, and p-Cdk1 (Tyr15). In full original blot, M; Protein marker, 0, 6  $\mu$ M; 7HF treatment does (0 and 6  $\mu$ M) at 24 h, Black outer square; border of full images, Red inner square and black head arrow; indicated protein bands; #The blots are shown the same in Figure 4C-D (Page 10).**

Caspase 7 (35 KDa) and  $\beta$ -actin (42 KDa)

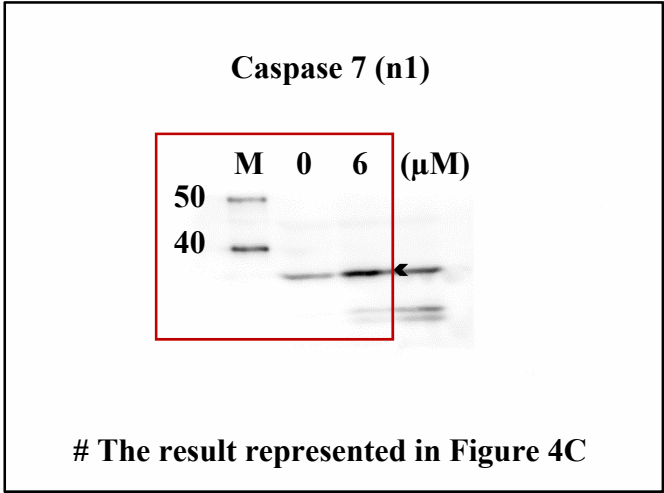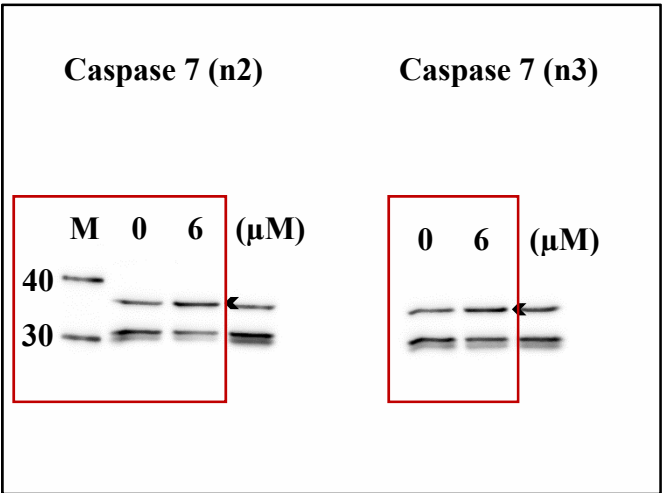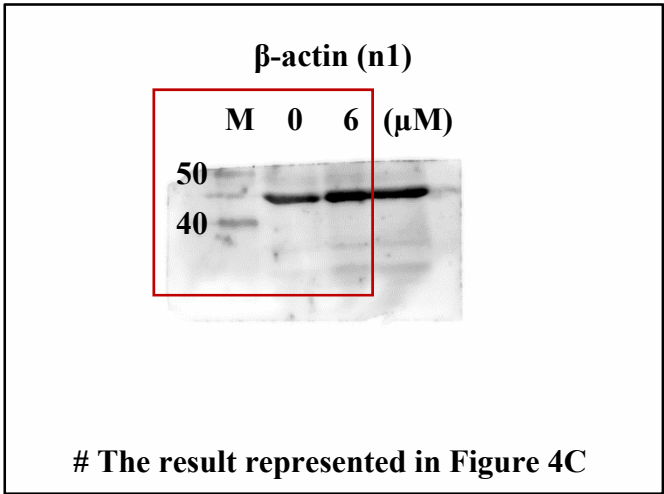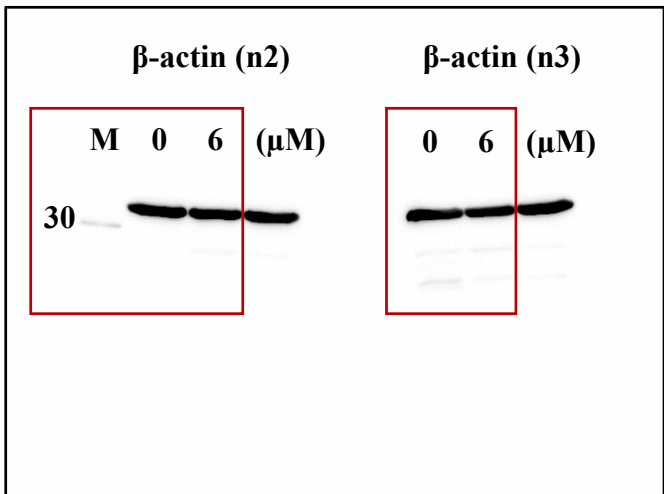

PP2A (62 KDa) and  $\beta$ -actin (42 KDa)

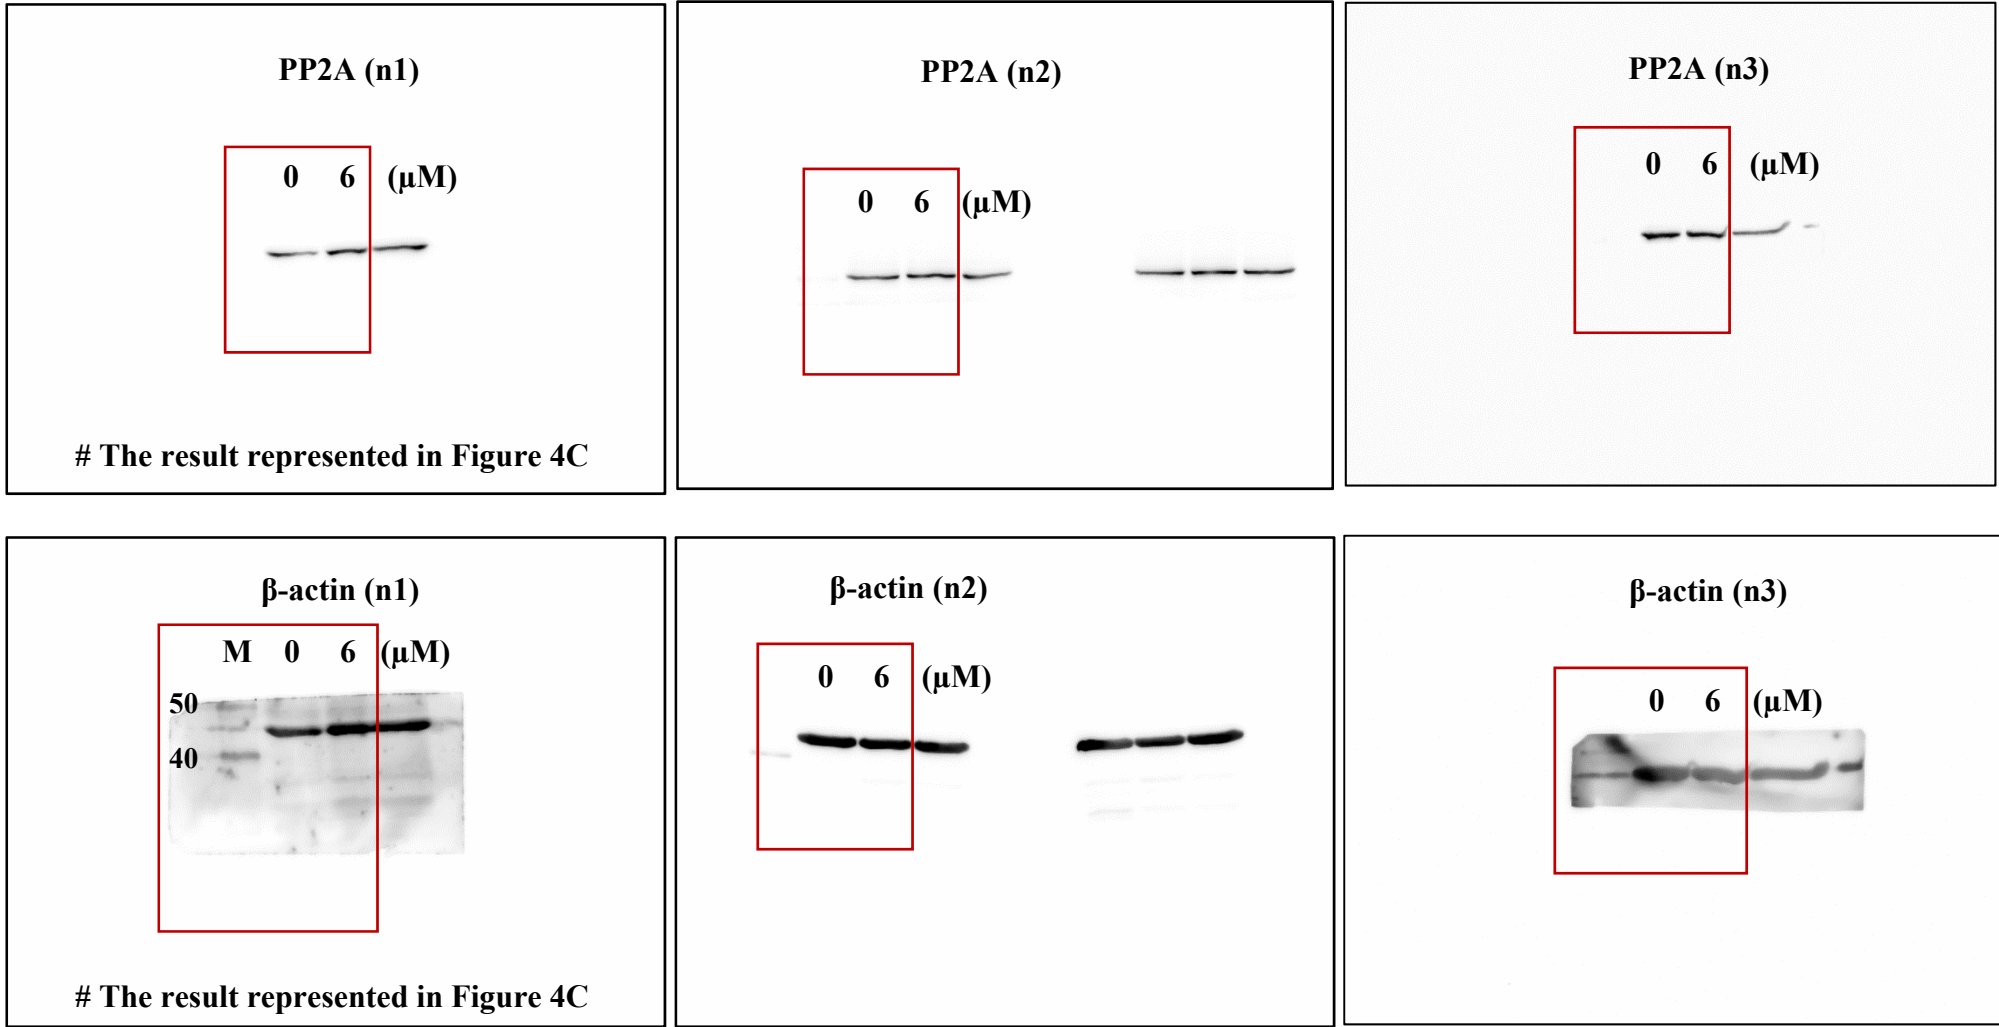

**Bub3 (40 KDa) and  $\beta$ -actin (42 KDa)**

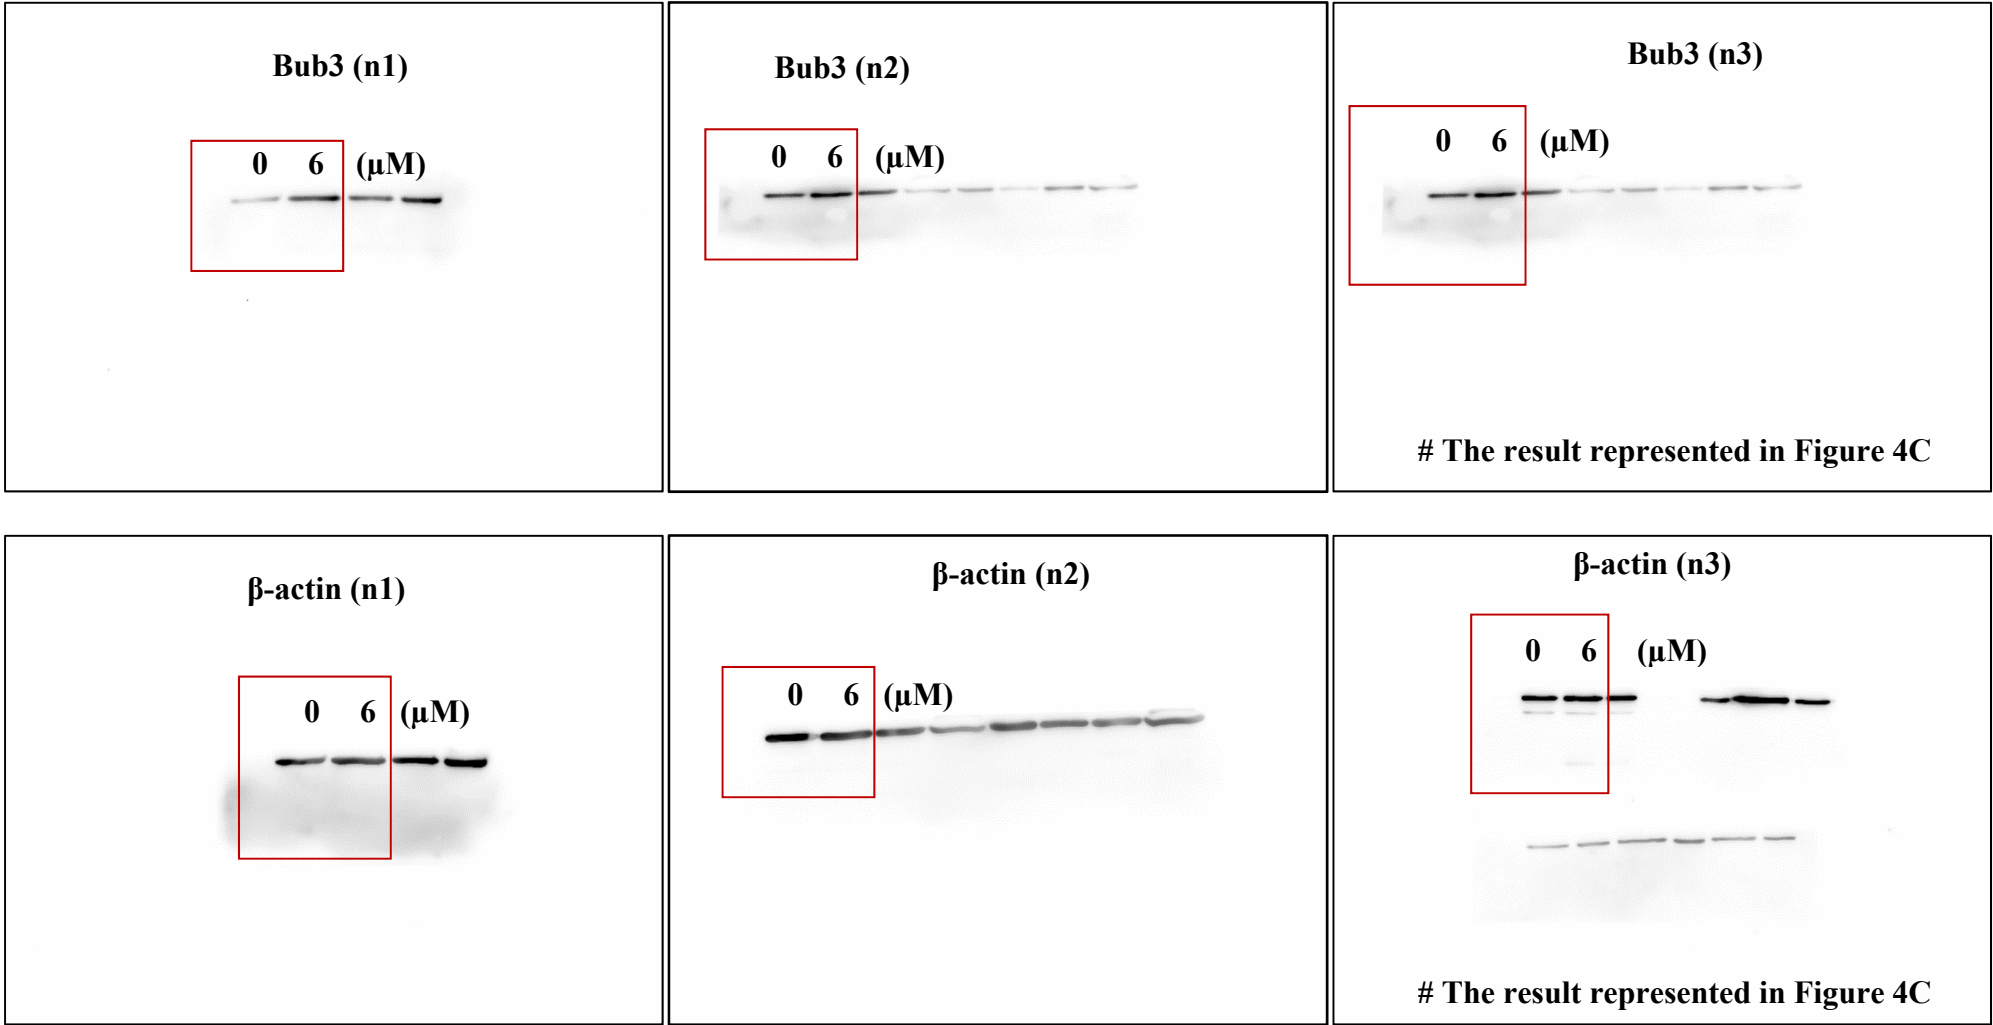

Cyclin B1 (55 KDa) and  $\beta$ -actin (42 KDa)

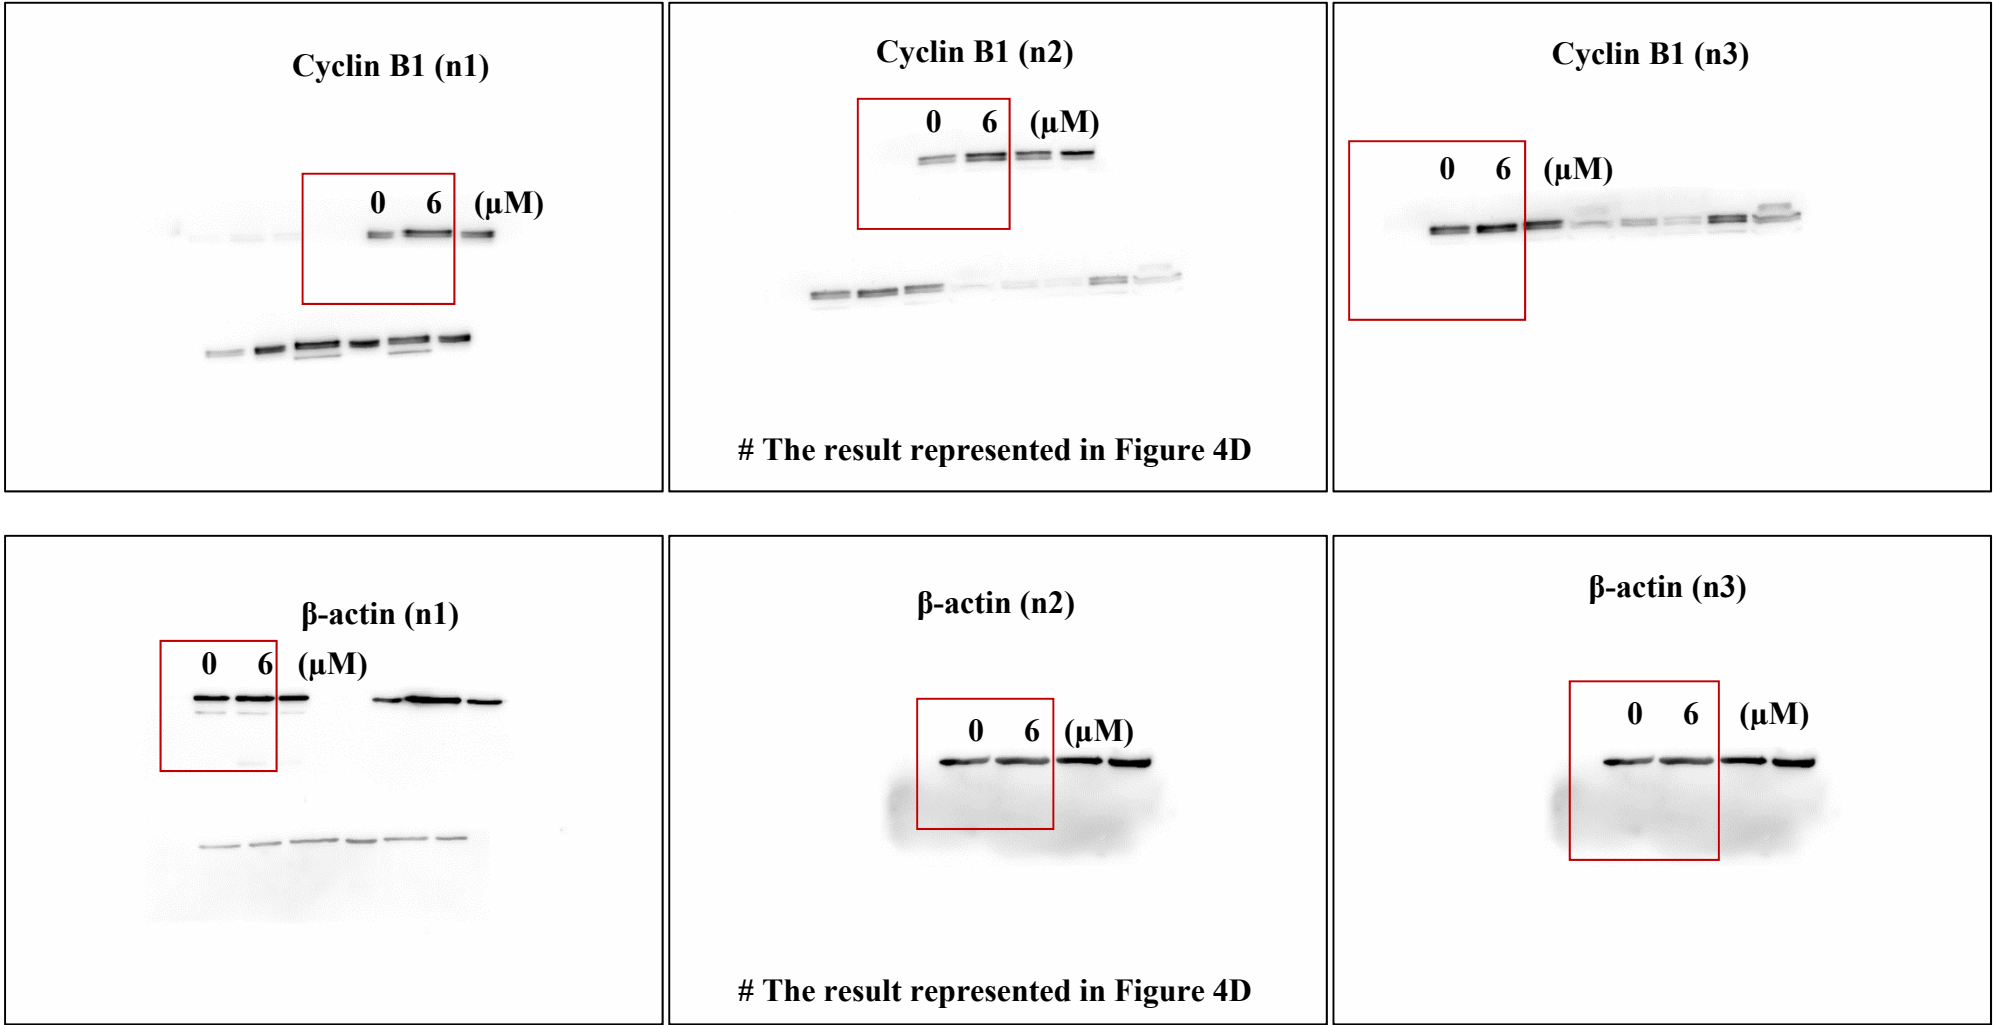

p-Cdk1 (Tyr15) (34 KDa) and  $\beta$ -actin (42 KDa)

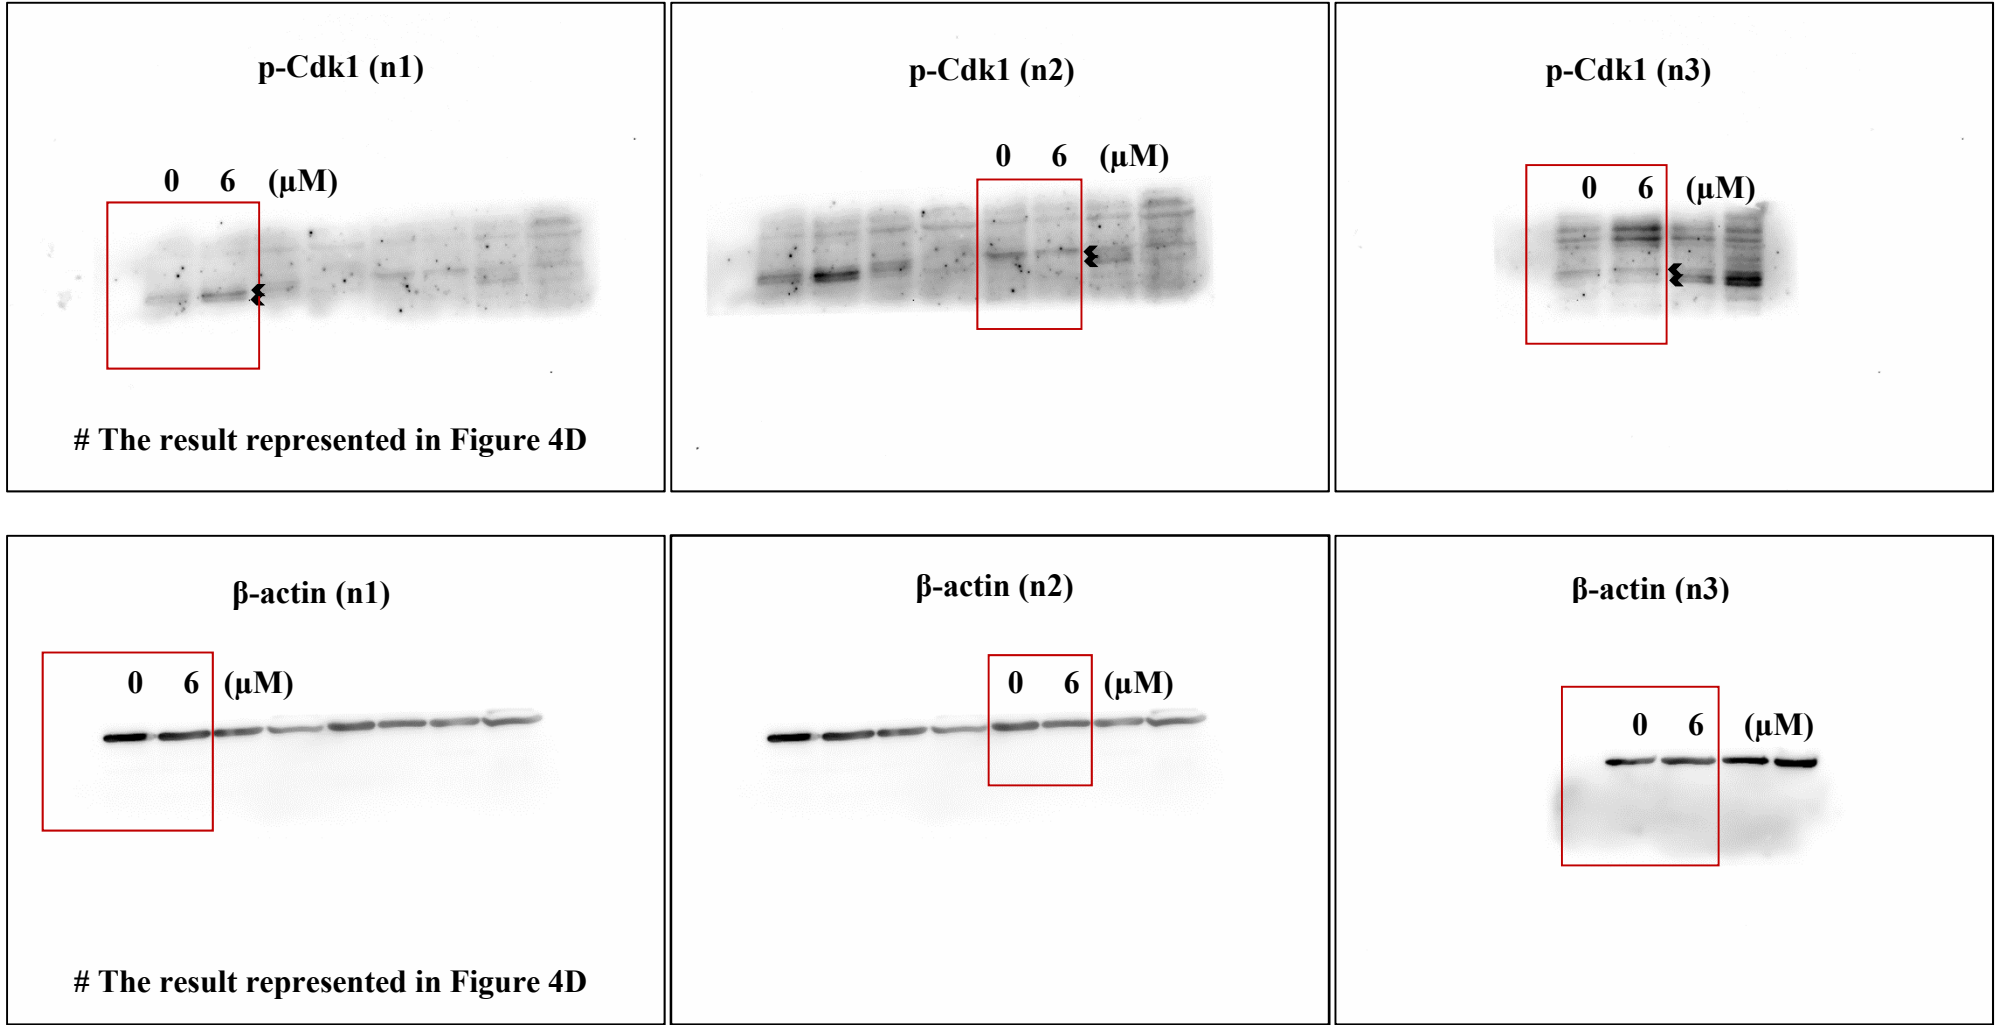

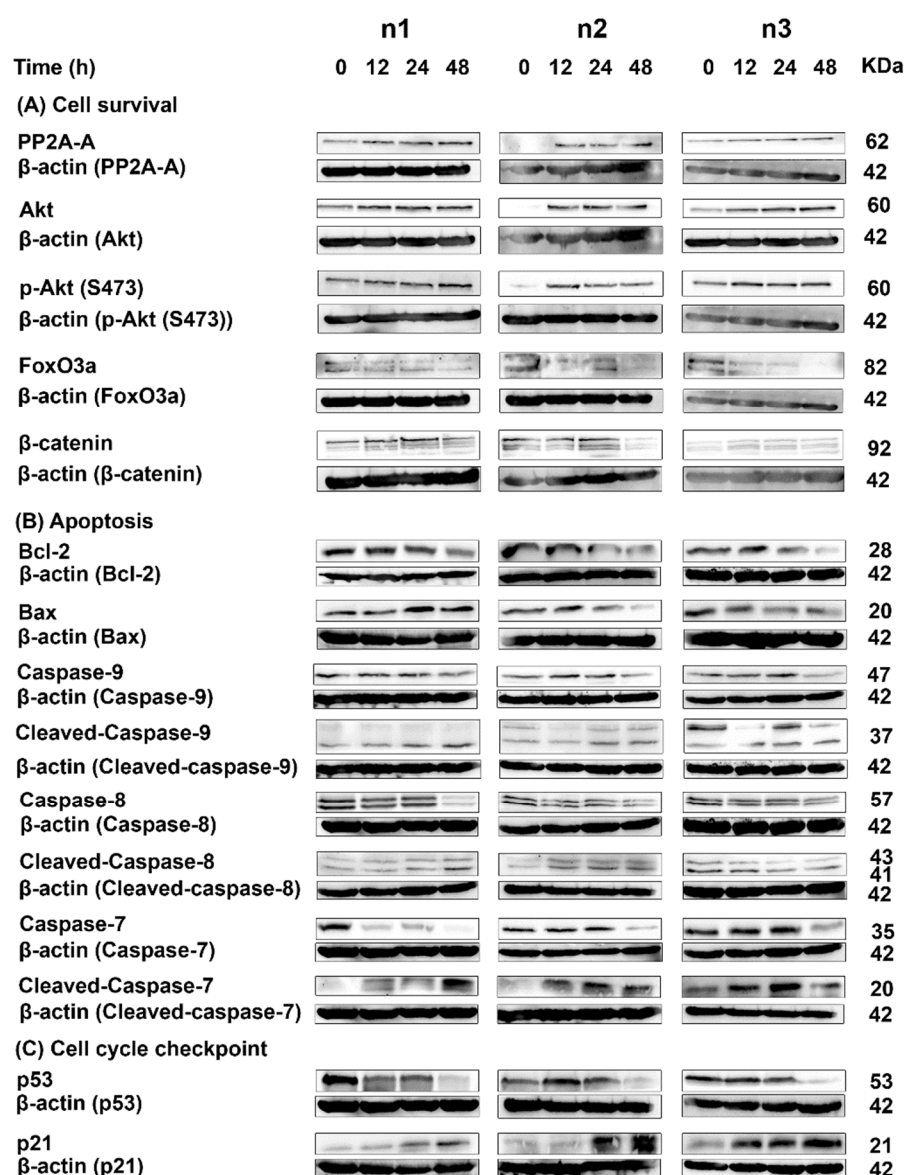

**Supplementary Materials Figure S5. Protein expression in triple-negative breast cancer cells treated with 6  $\mu$ M 7HF for 0, 12, 24, and 48 h. (A) Cell survival-related, (B) cell apoptotic, (C) cell cycle checkpoint protein expression after 7HF treatment. These proteins were depicted along with their  $\beta$ -actin. The results were performed in three independent experiments (n1-n3). The experiment n1-n3 used for calculation of band intensity (or relative expression) from indicated protein and  $\beta$ -actin in Figure 5A-C (page 11). The full original Western blot images show in page 10-24 in this revision as follows: PP2A-A, Akt, p-Akt (Ser473), FoxO3a, and  $\beta$ -catenin, Bcl-2, Bax, Caspase-9, Cleaved caspase-9, Caspase-8, Cleaved-caspase-8, Caspase 7, Cleaved caspase 7, p53, and p21. In full original blot, M;**

Protein marker, 0, 12, 24, 48 h; 7HF treatment times (0, 12, 24 and 48 h) at 6  $\mu$ M, Black outer square; border of full images, Red inner square and black head arrow; indicated protein bands;  
#The blots are shown the same in Figure 5A-C (Page 11).

PP2A (62 KDa) and  $\beta$ -actin (42 KDa)

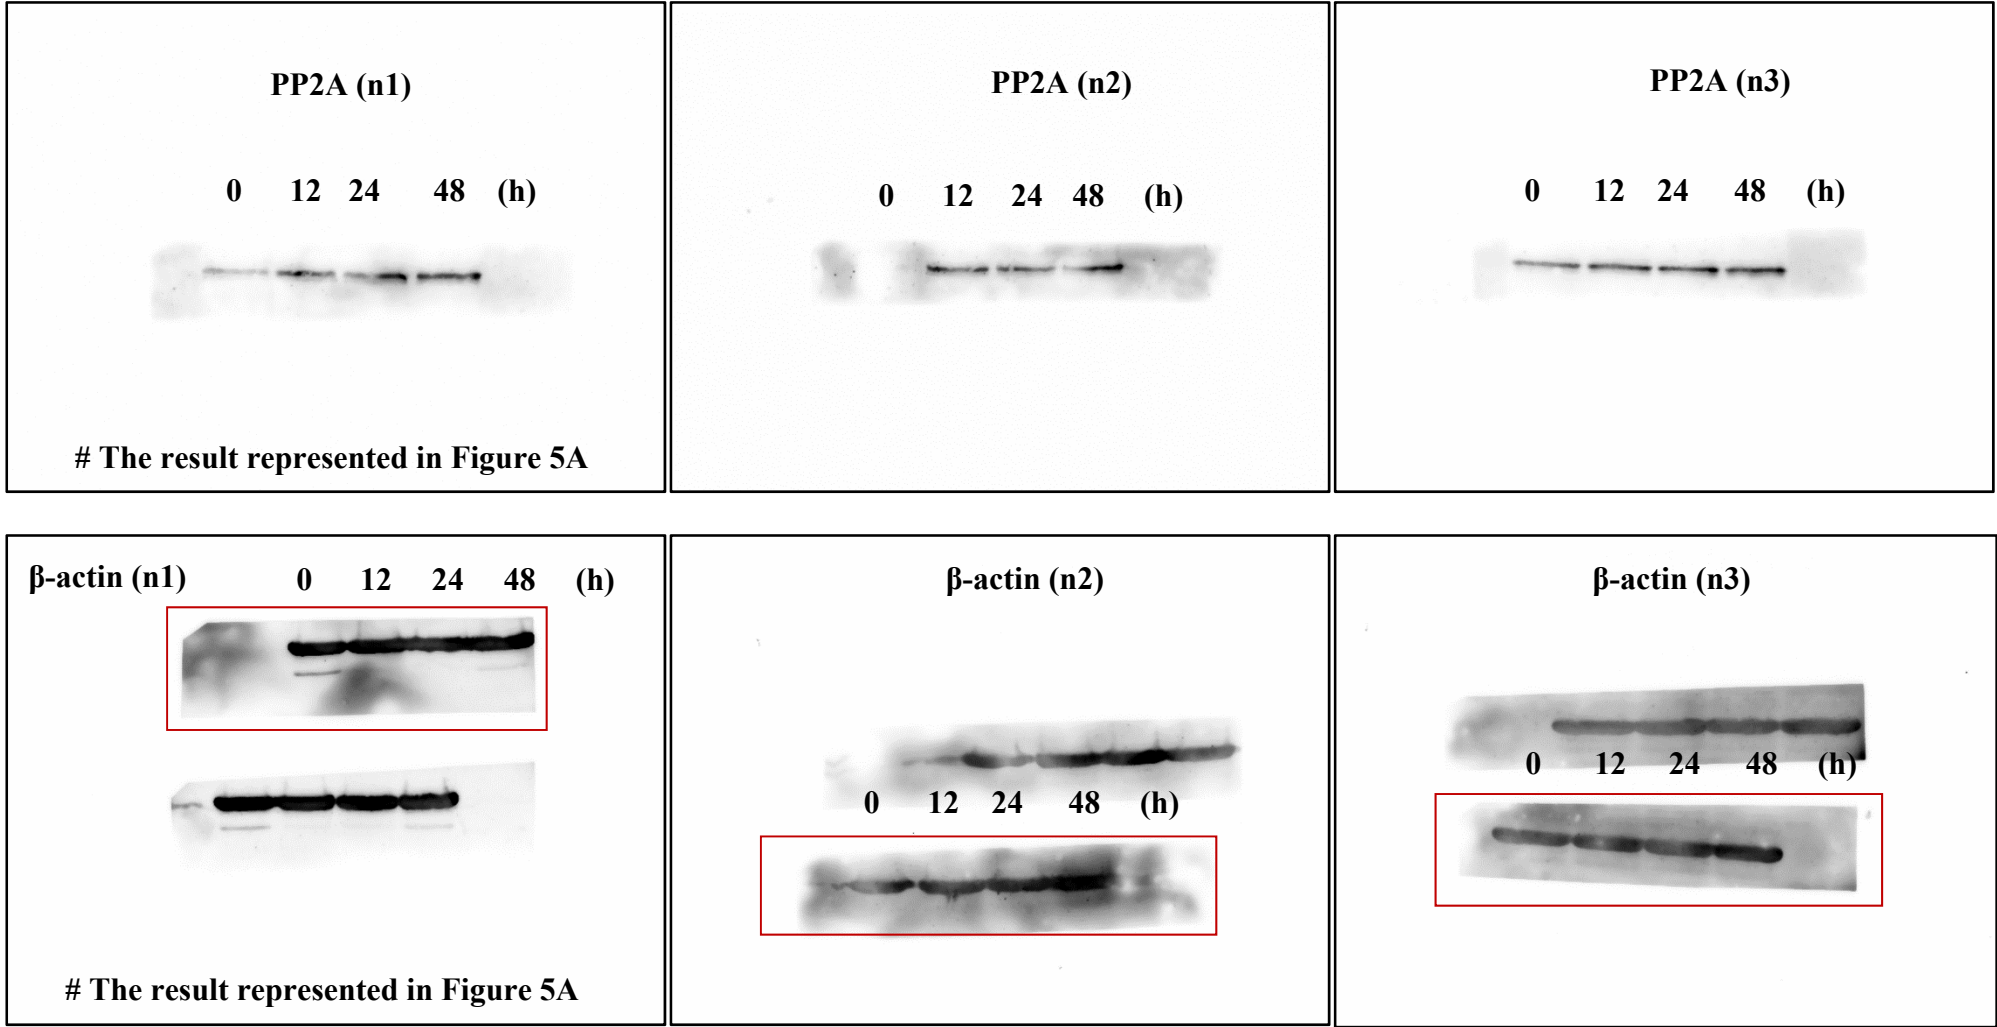

Akt (60 KDa) and  $\beta$ -actin (42 KDa)

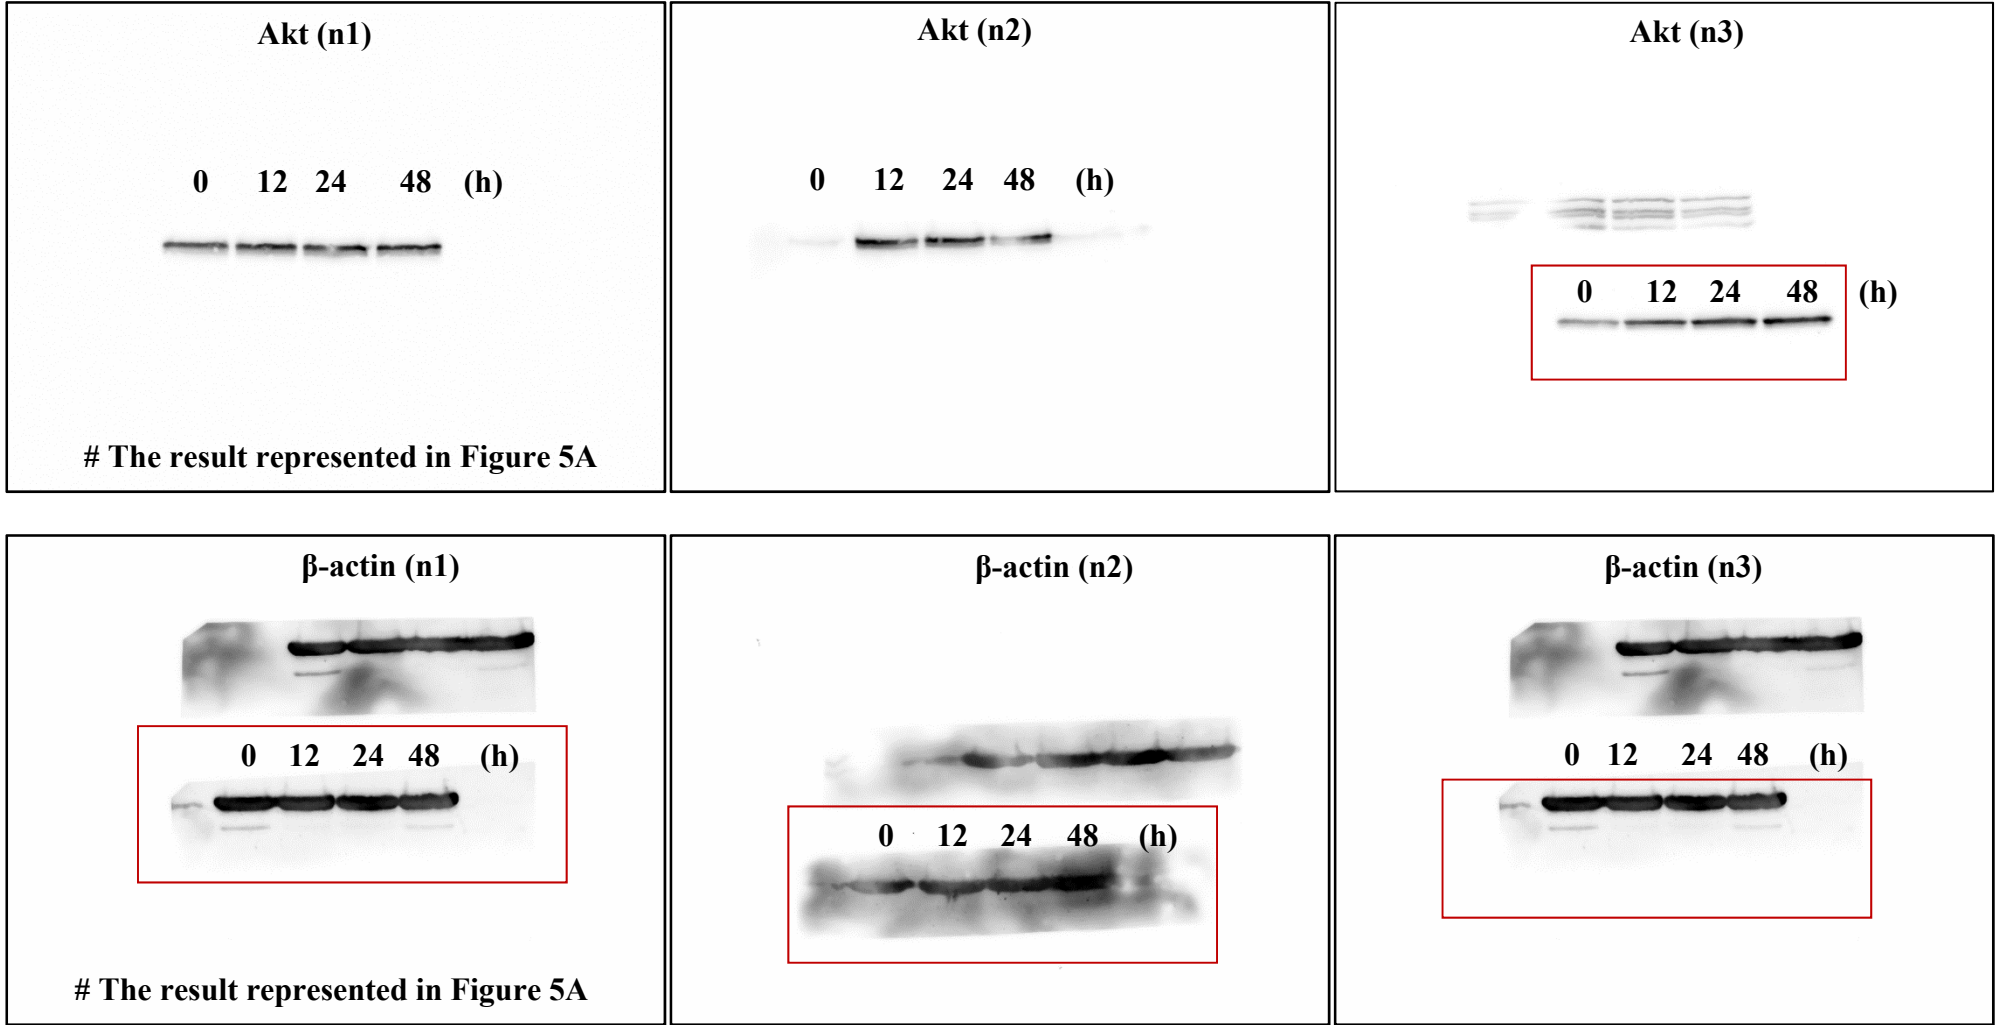

**p-Akt (Ser473) (60 KDa) and  $\beta$ -actin (42 KDa)**

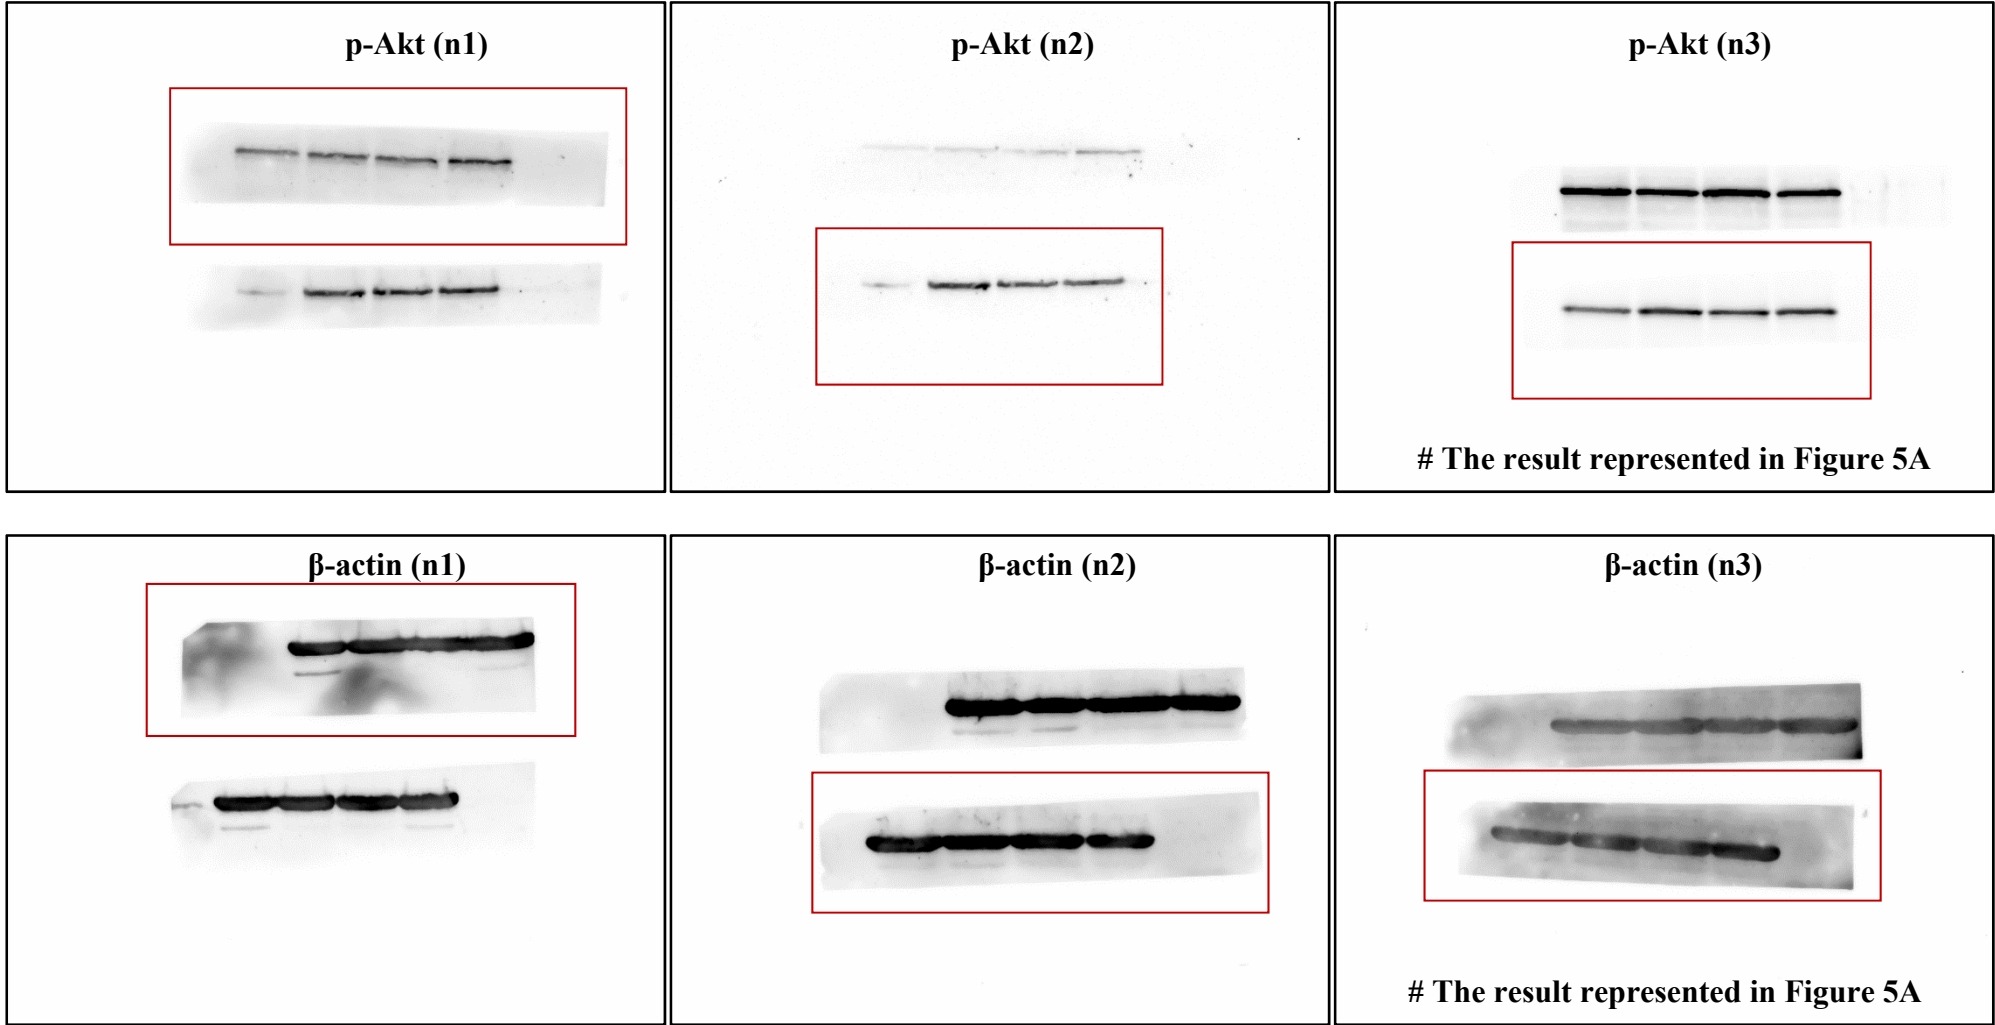

**FoxO3a (82 KDa) and  $\beta$ -actin (42 KDa)**

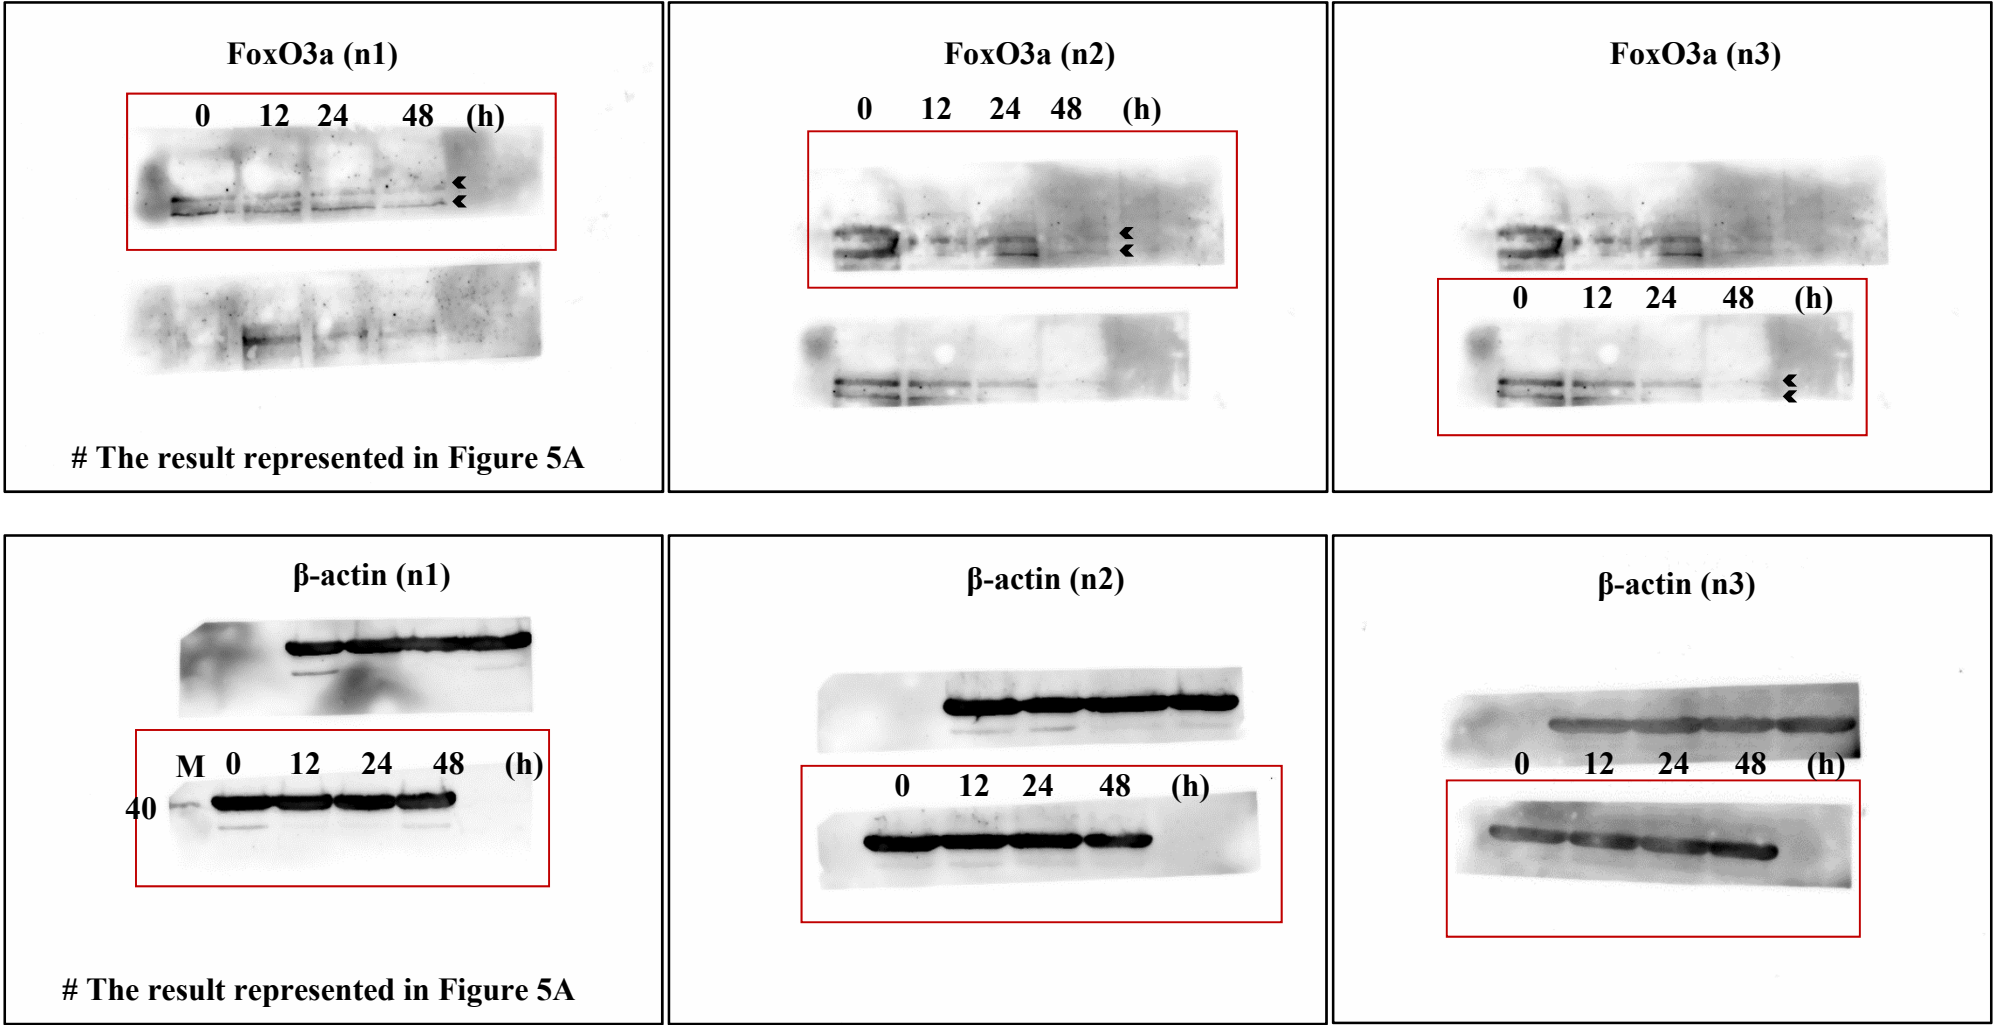

**$\beta$ -catenin (92 KDa) and  $\beta$ -actin (42 KDa)**

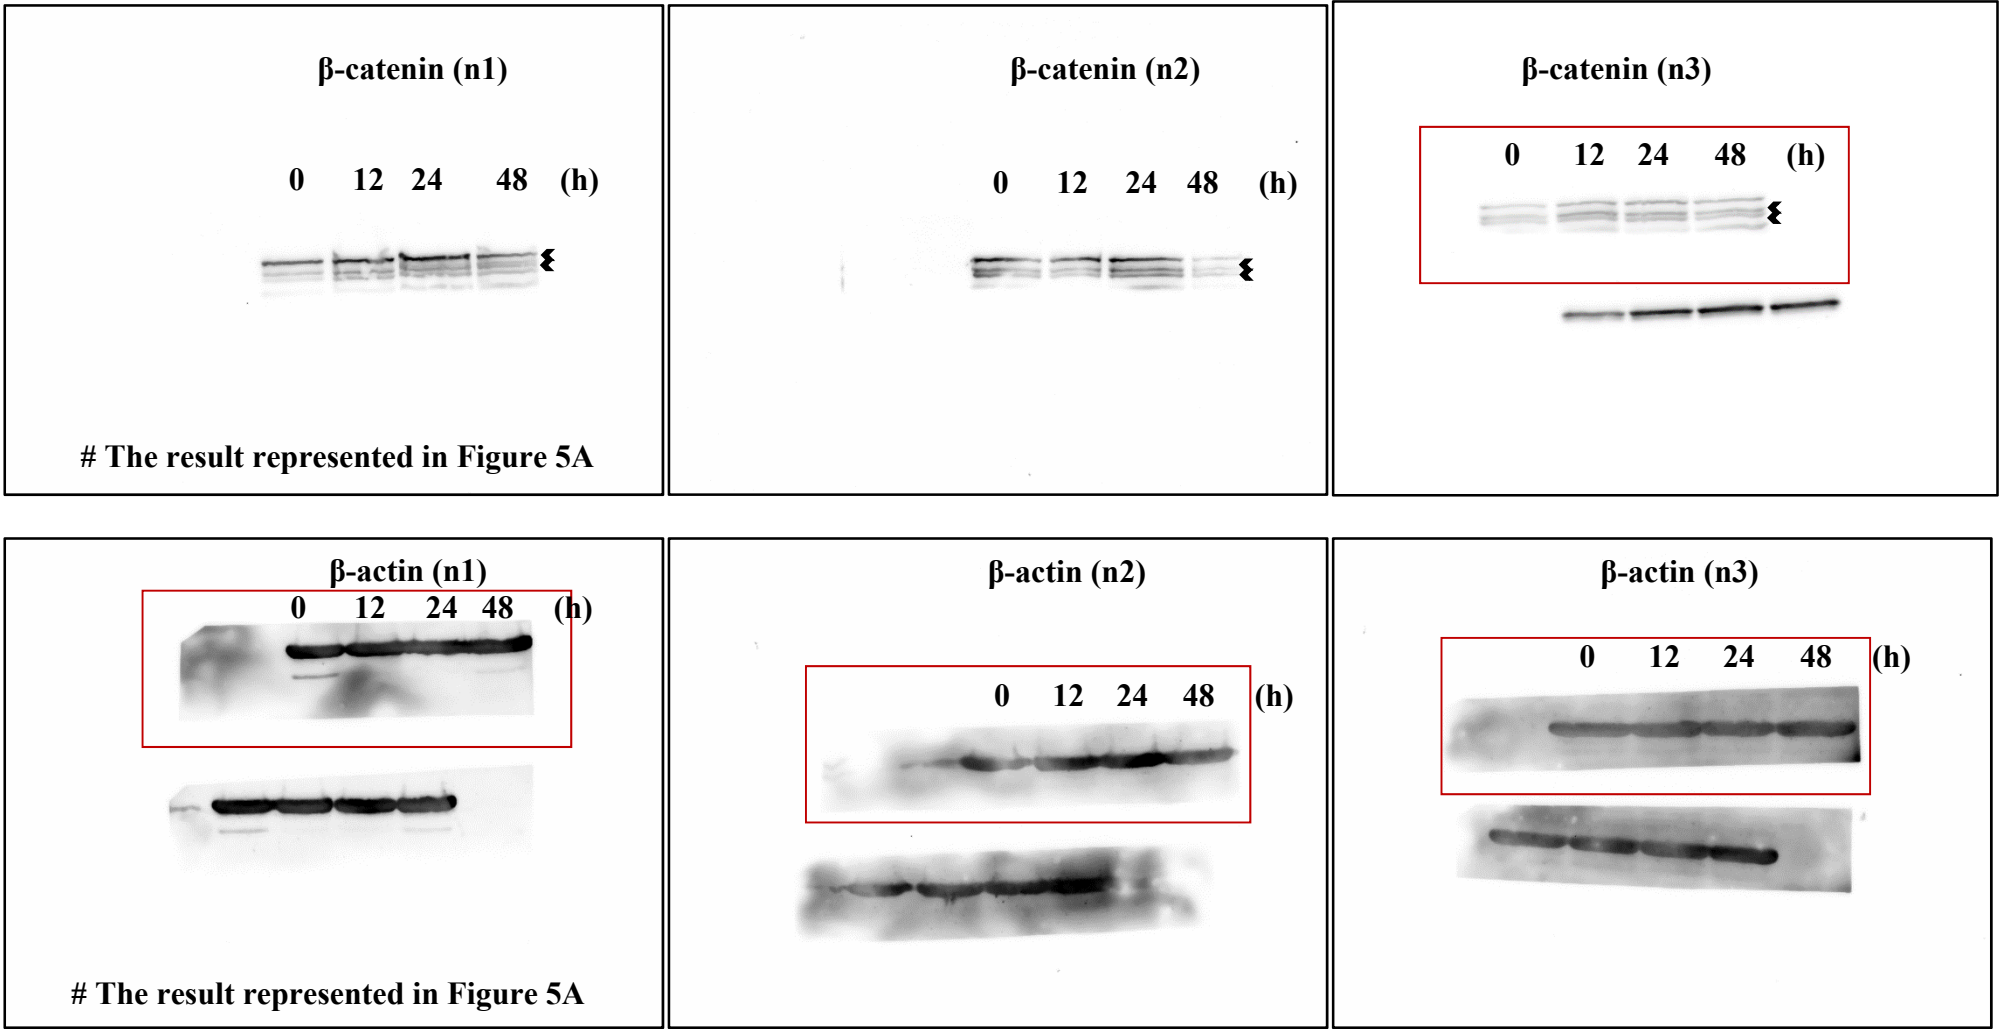

**Bcl-2 (28 KDa) and  $\beta$ -actin (42 KDa)**

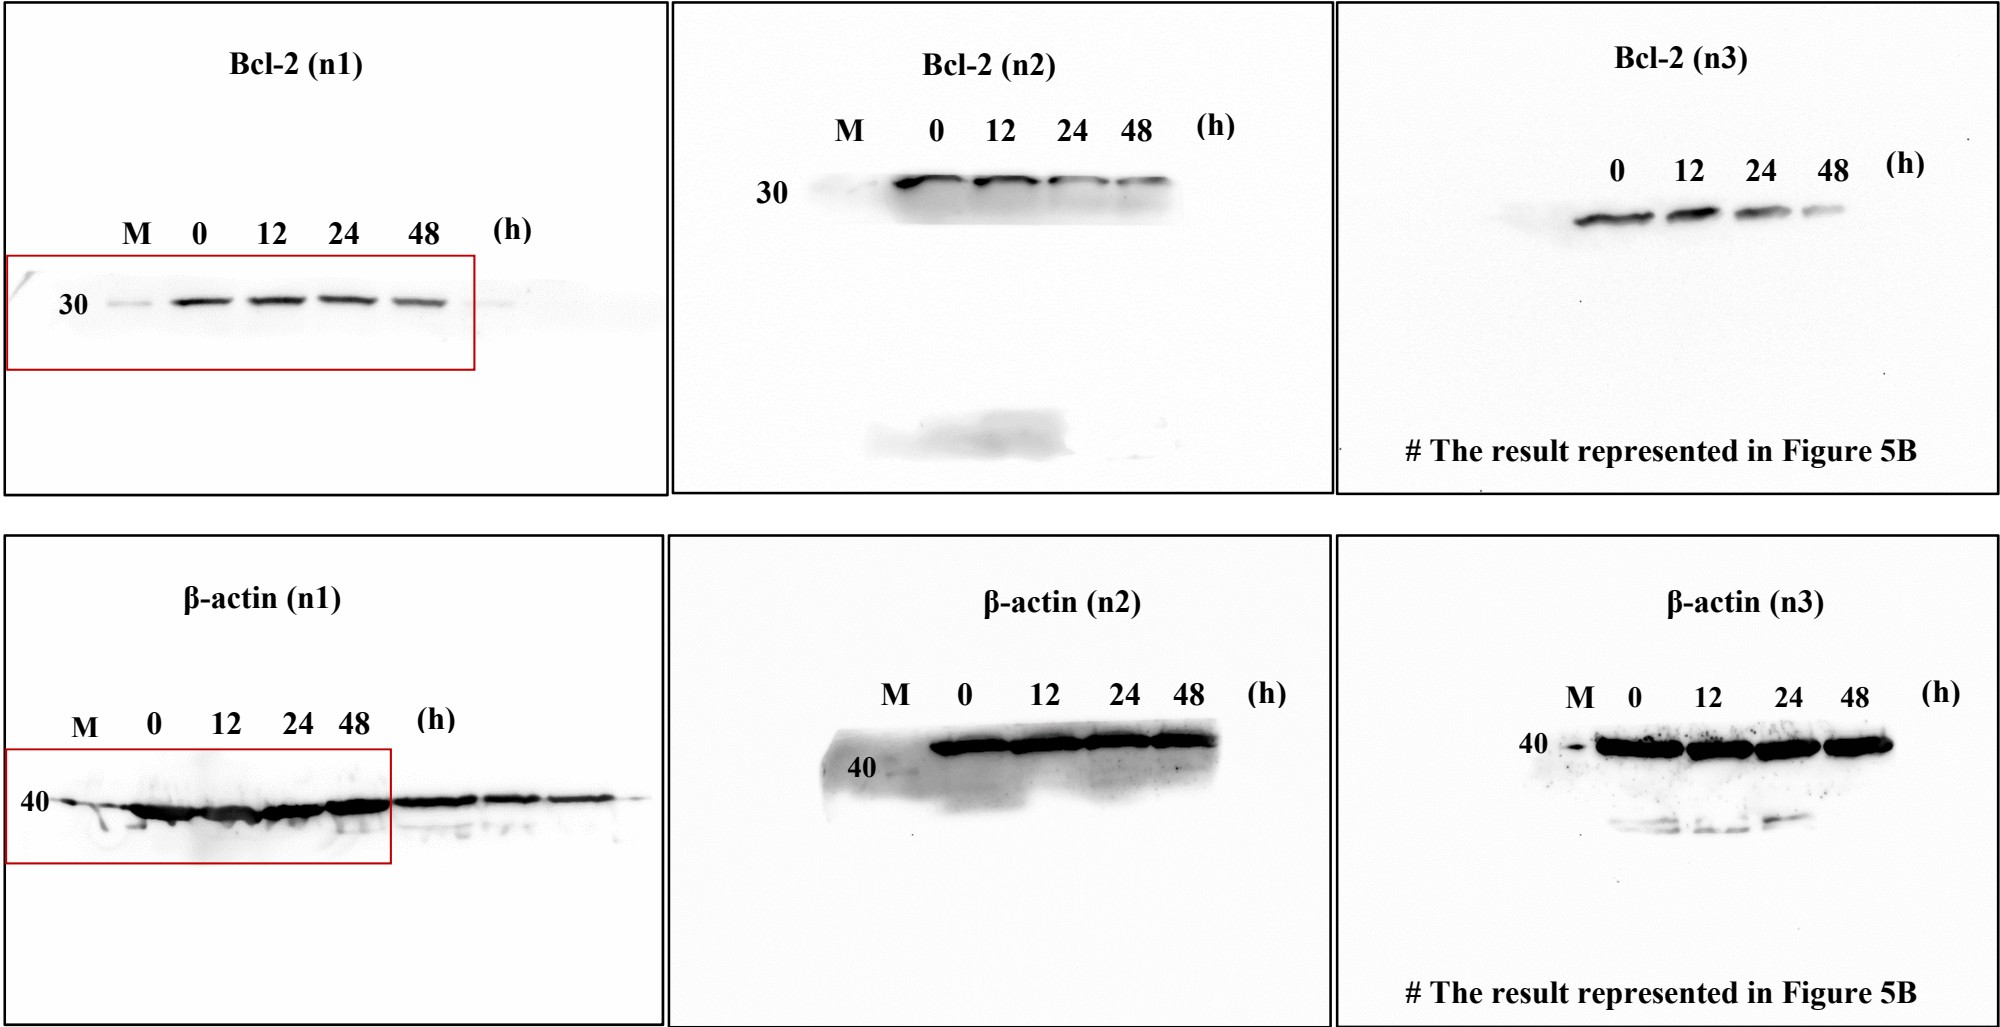

**Bax (20 KDa) and  $\beta$ -actin (42 KDa)**

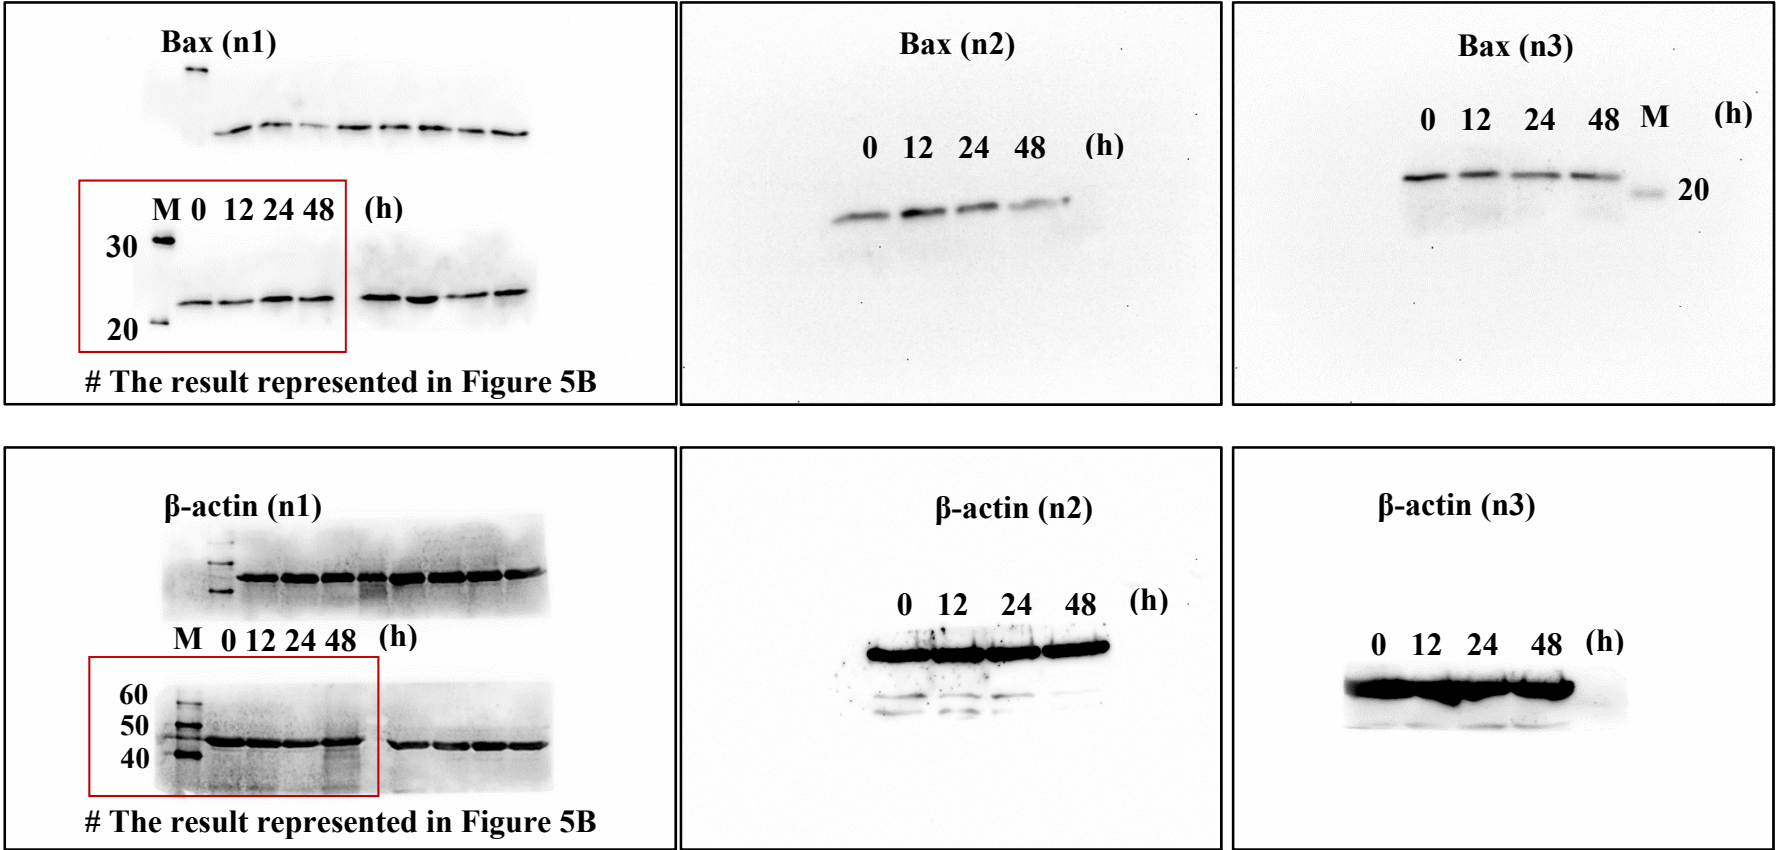

Caspase 9 (47 KDa) and  $\beta$ -actin (42 KDa)

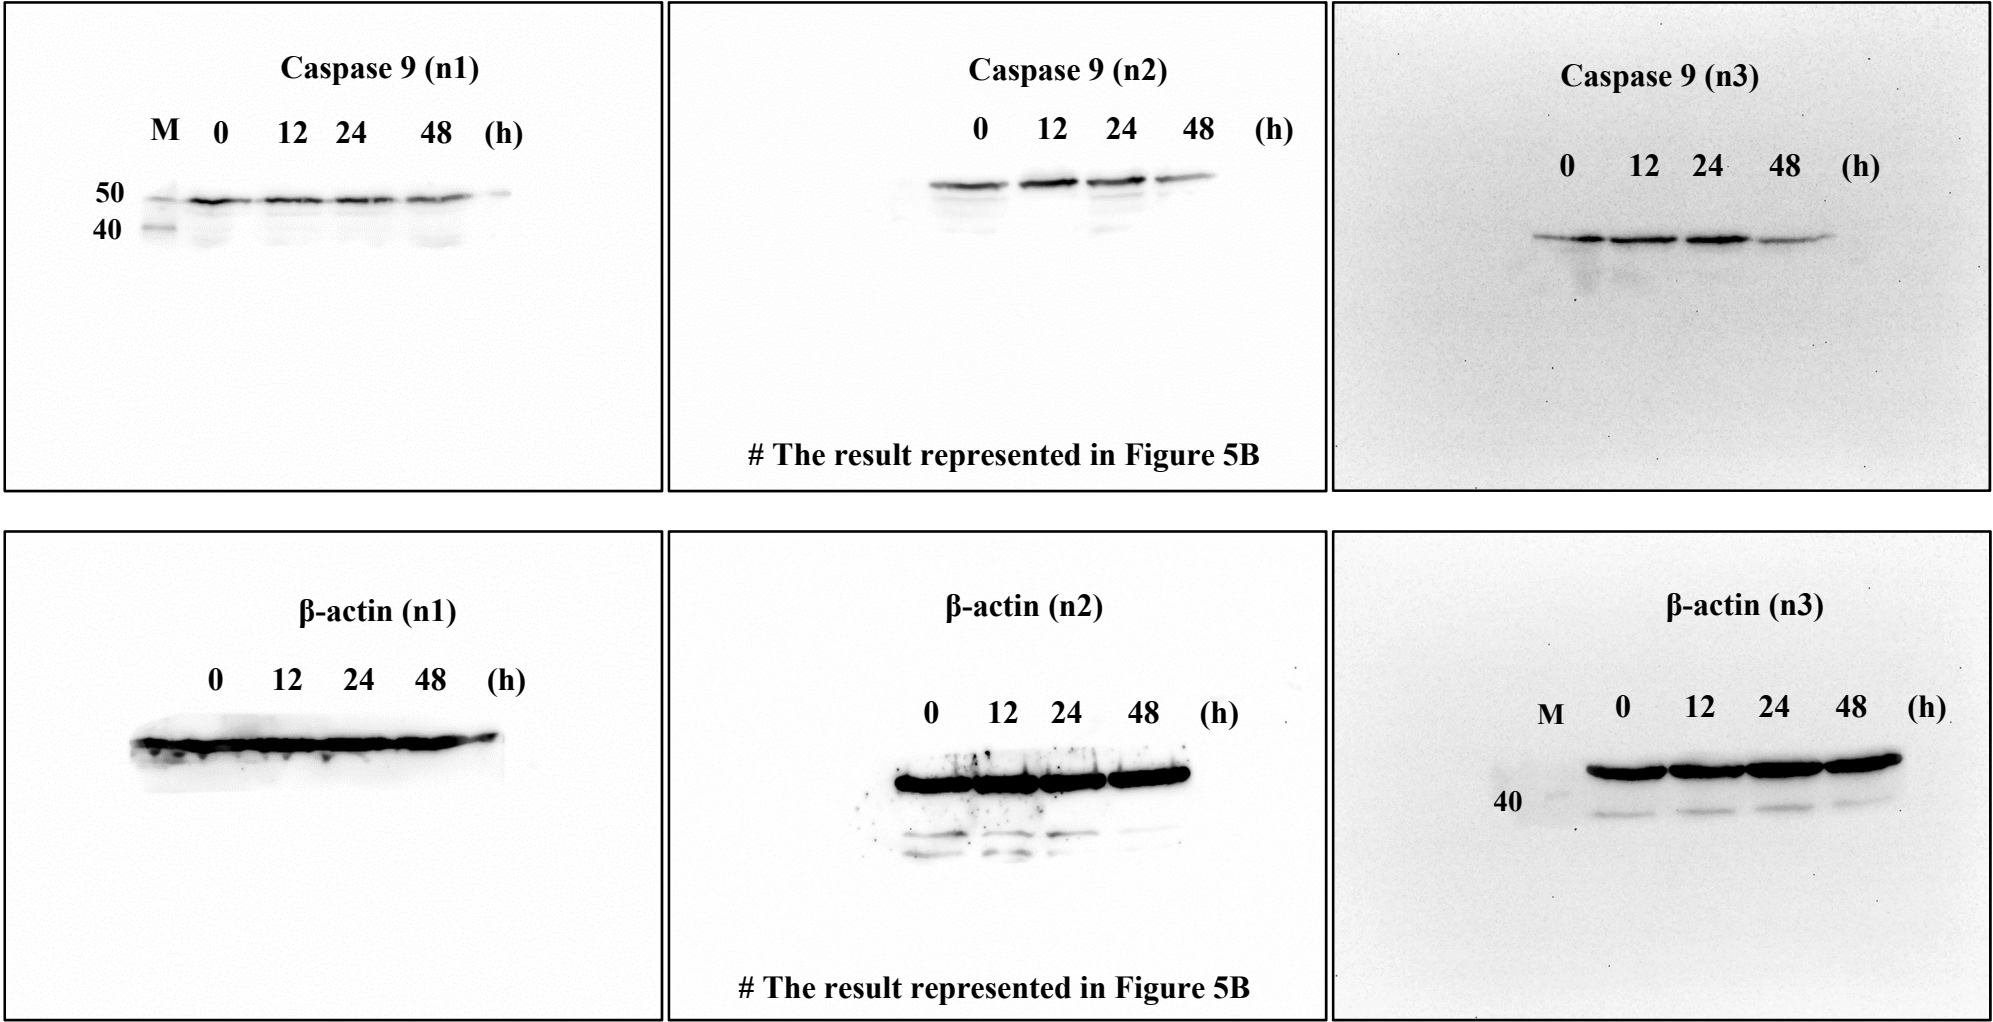

Cleaved caspase 9 (37 KDa) and  $\beta$ -actin (42 KDa)

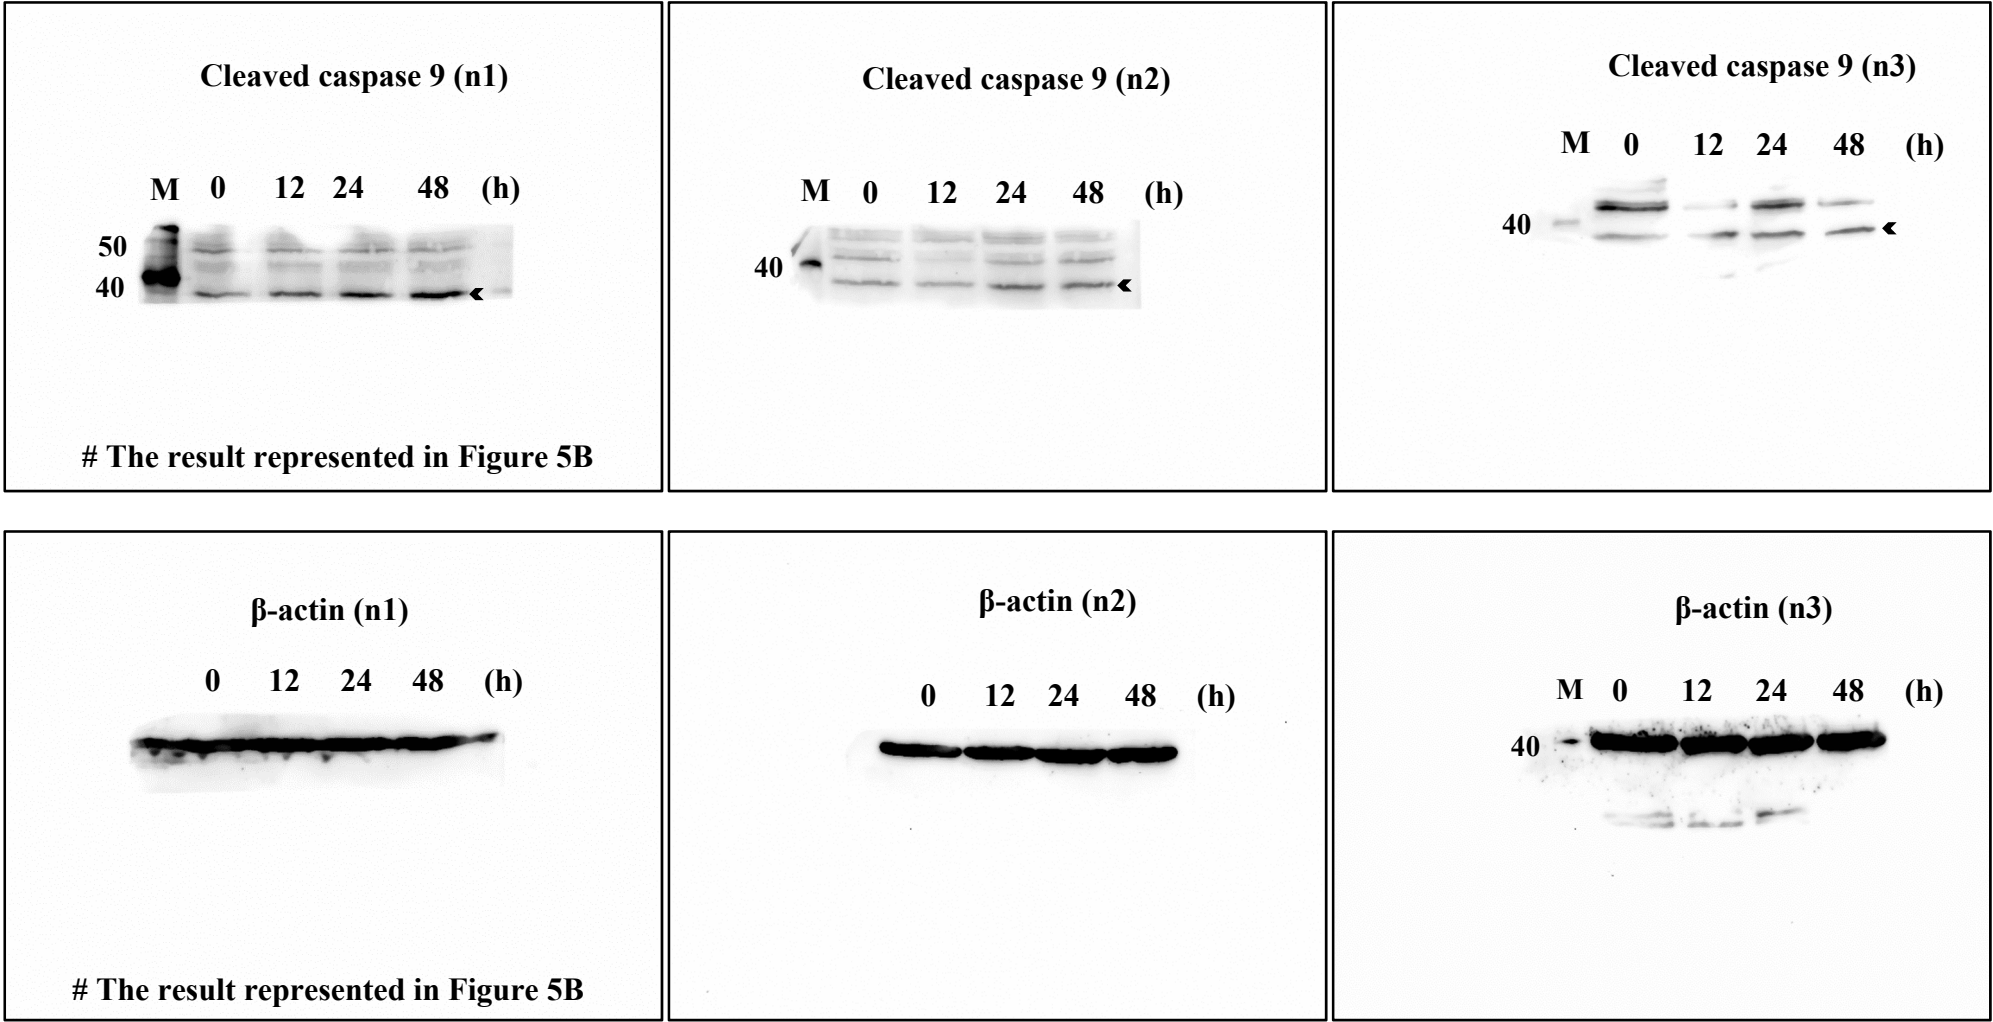

Caspase 8 (57 KDa) and  $\beta$ -actin (42 KDa)

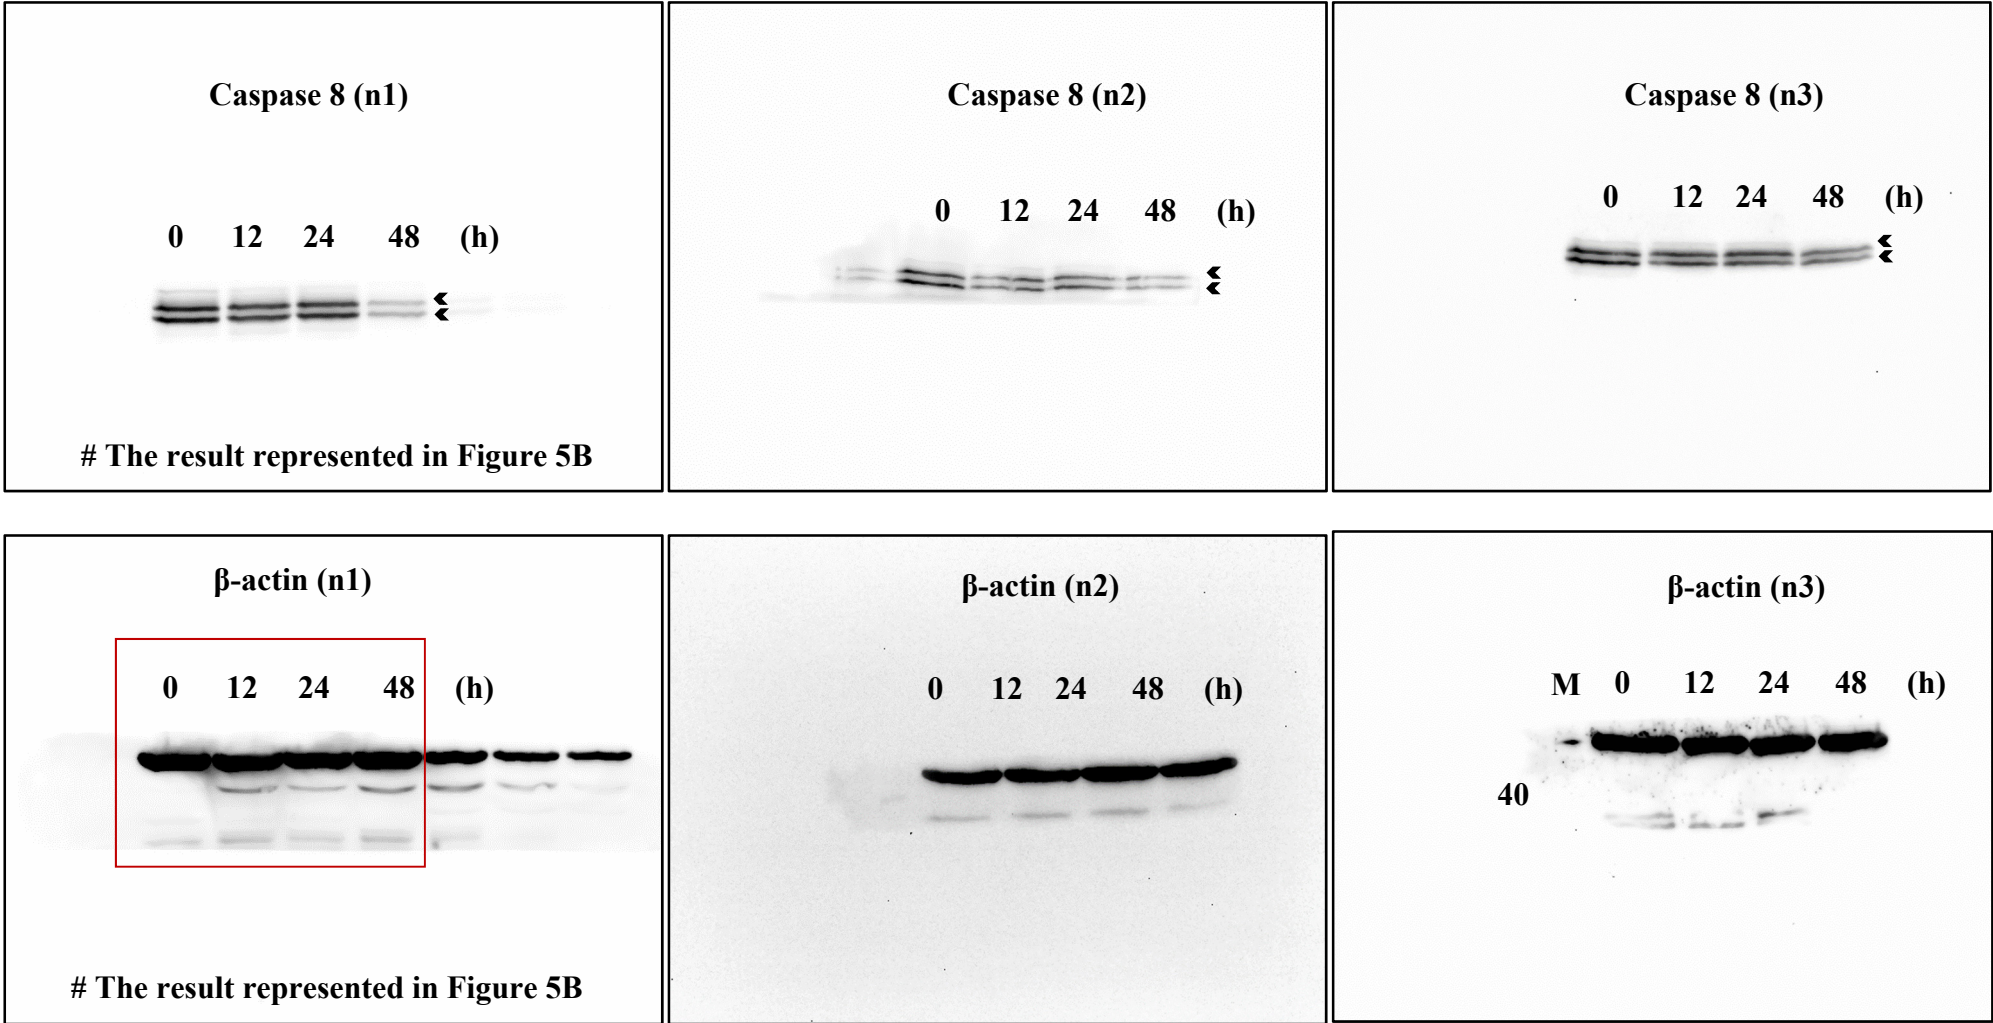

Cleaved caspase 8 (41 and 43 KDa) and  $\beta$ -actin (42 KDa)

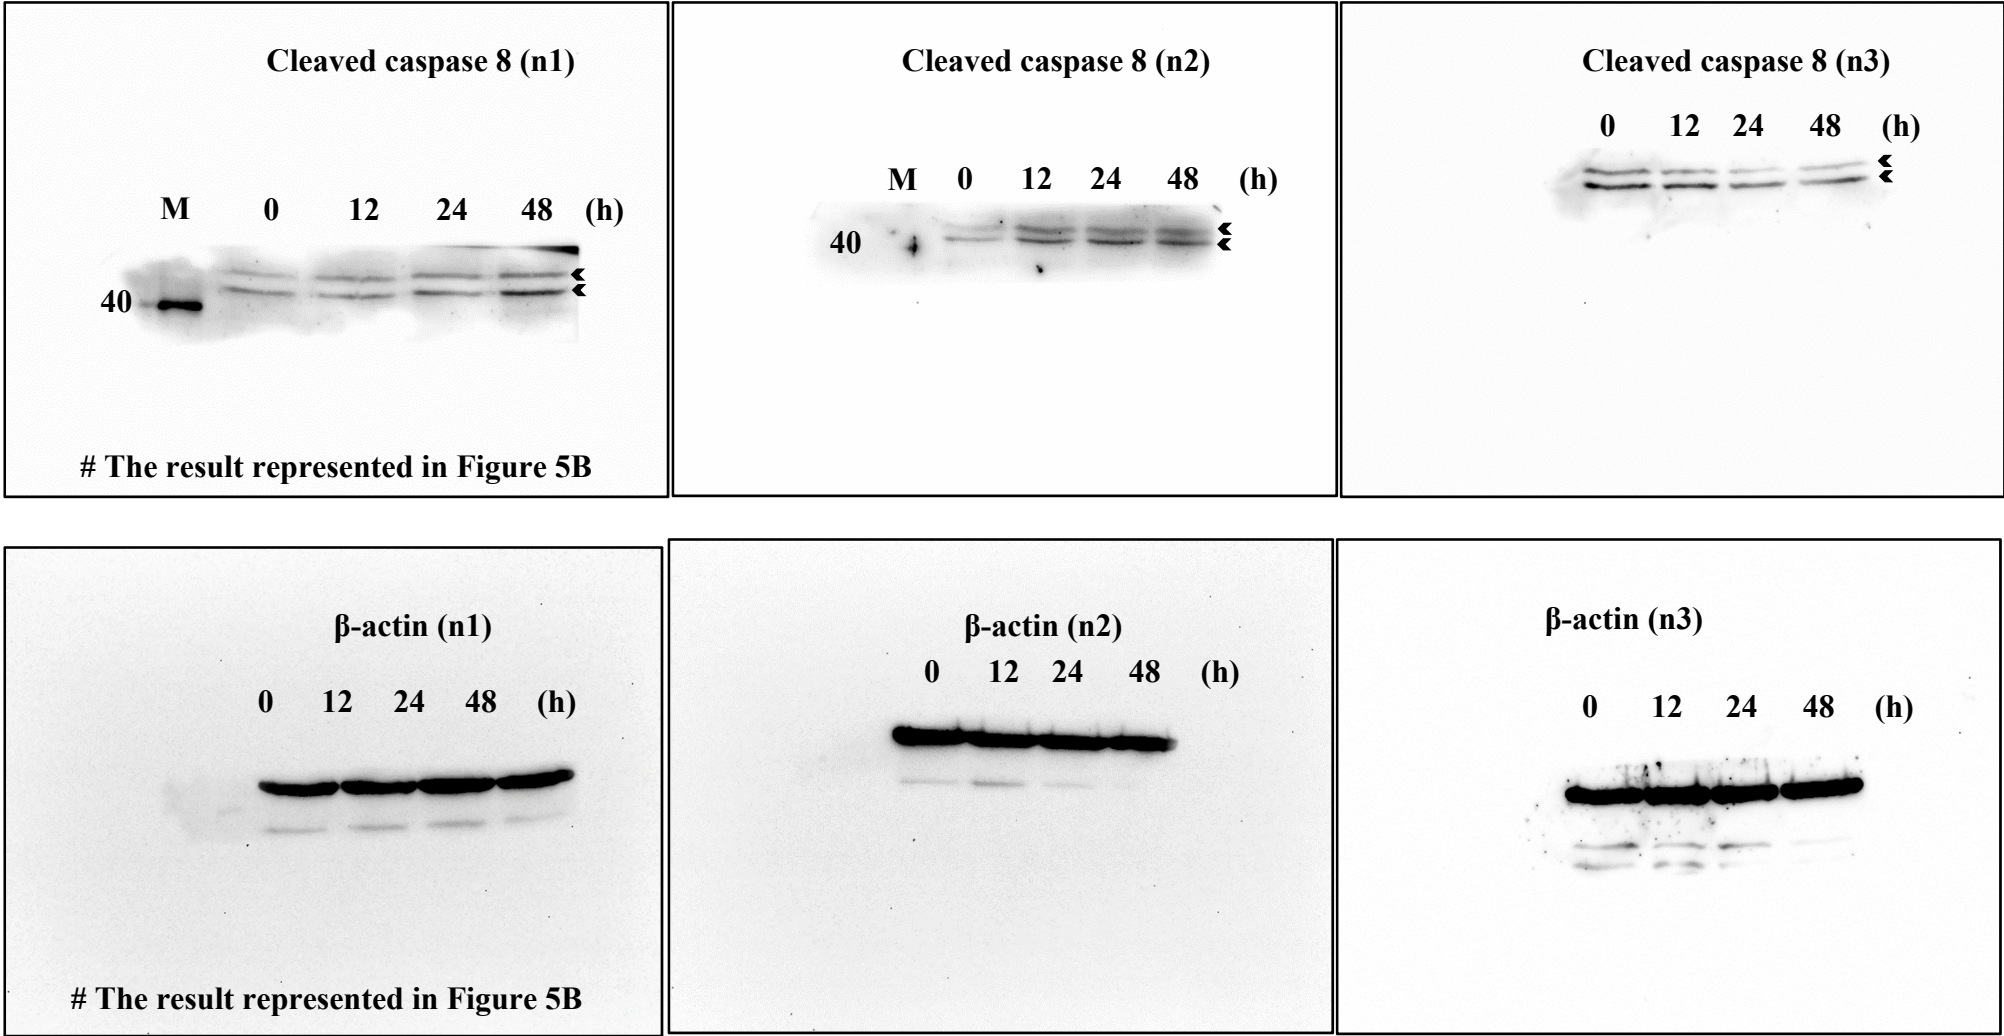

Caspase 7 (35 KDa) and  $\beta$ -actin (42 KDa)

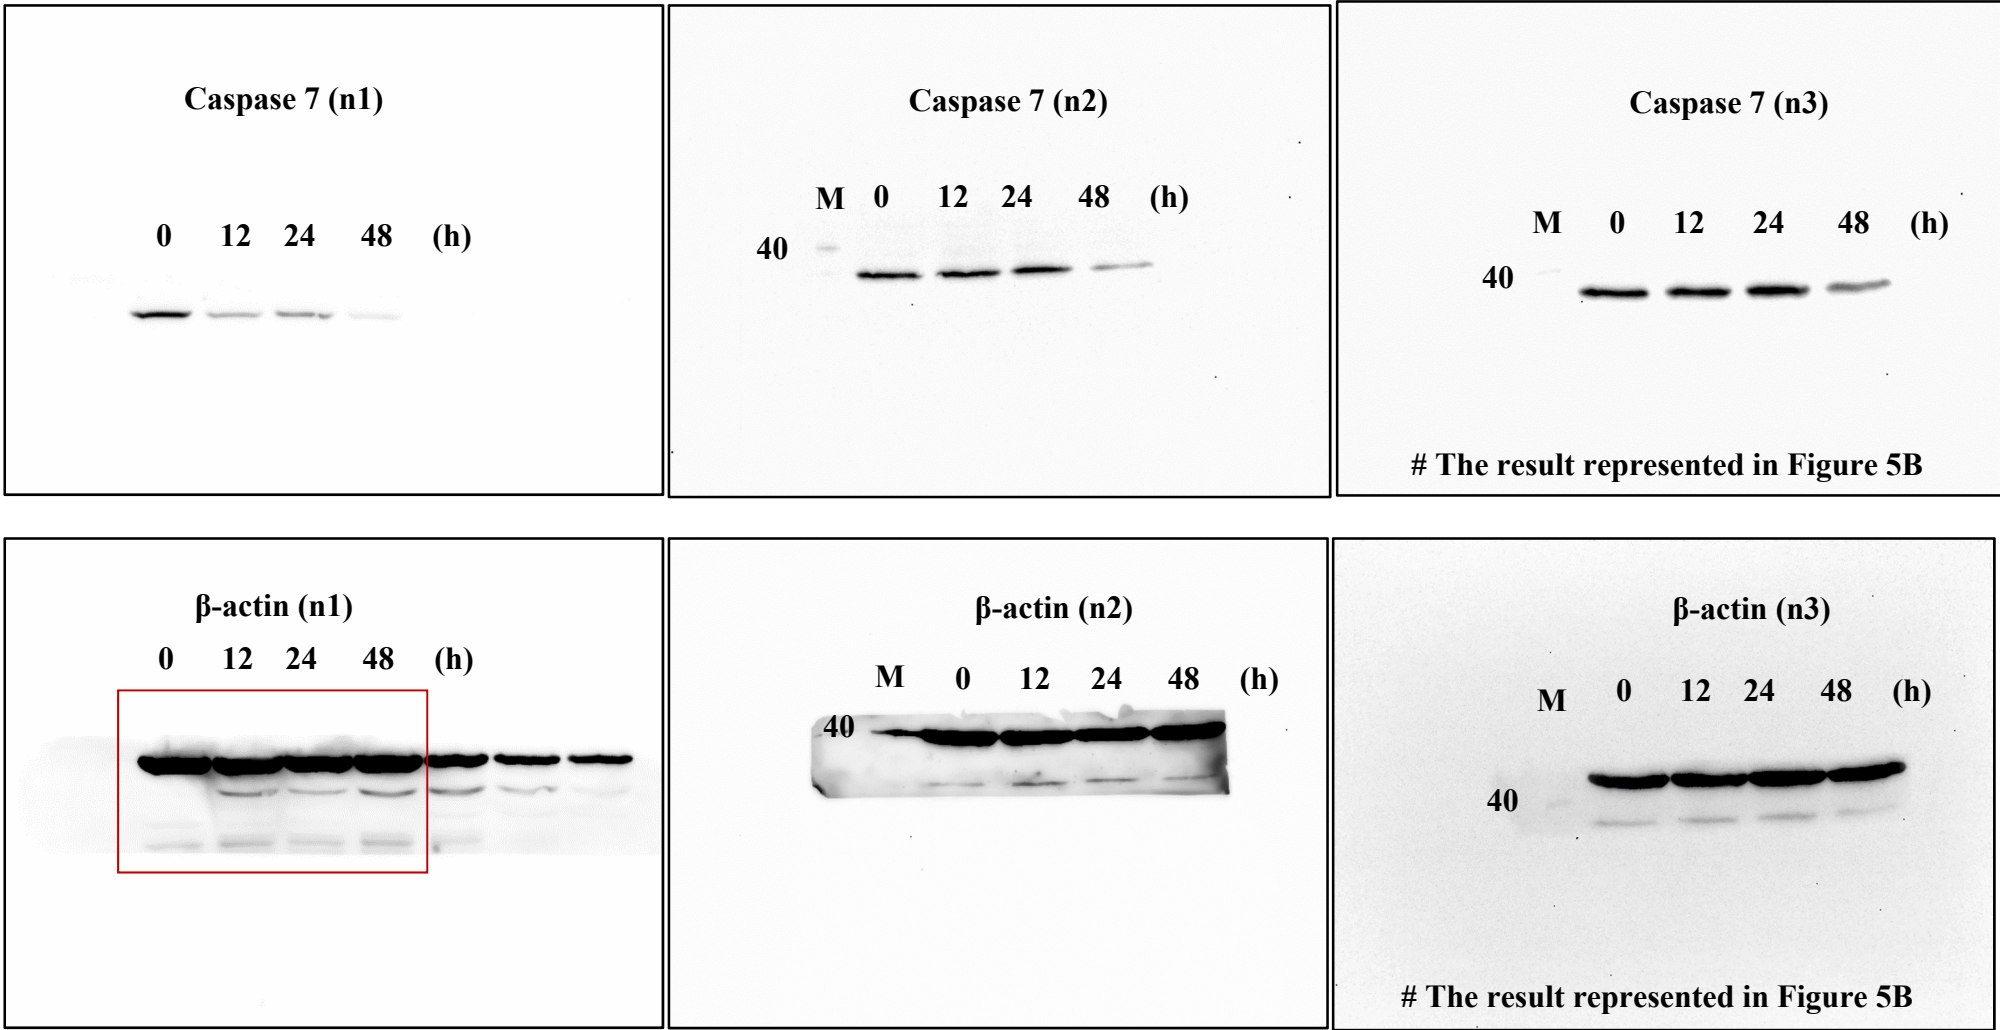

Cleaved caspase 7 (20 KDa) and  $\beta$ -actin (42 KDa)

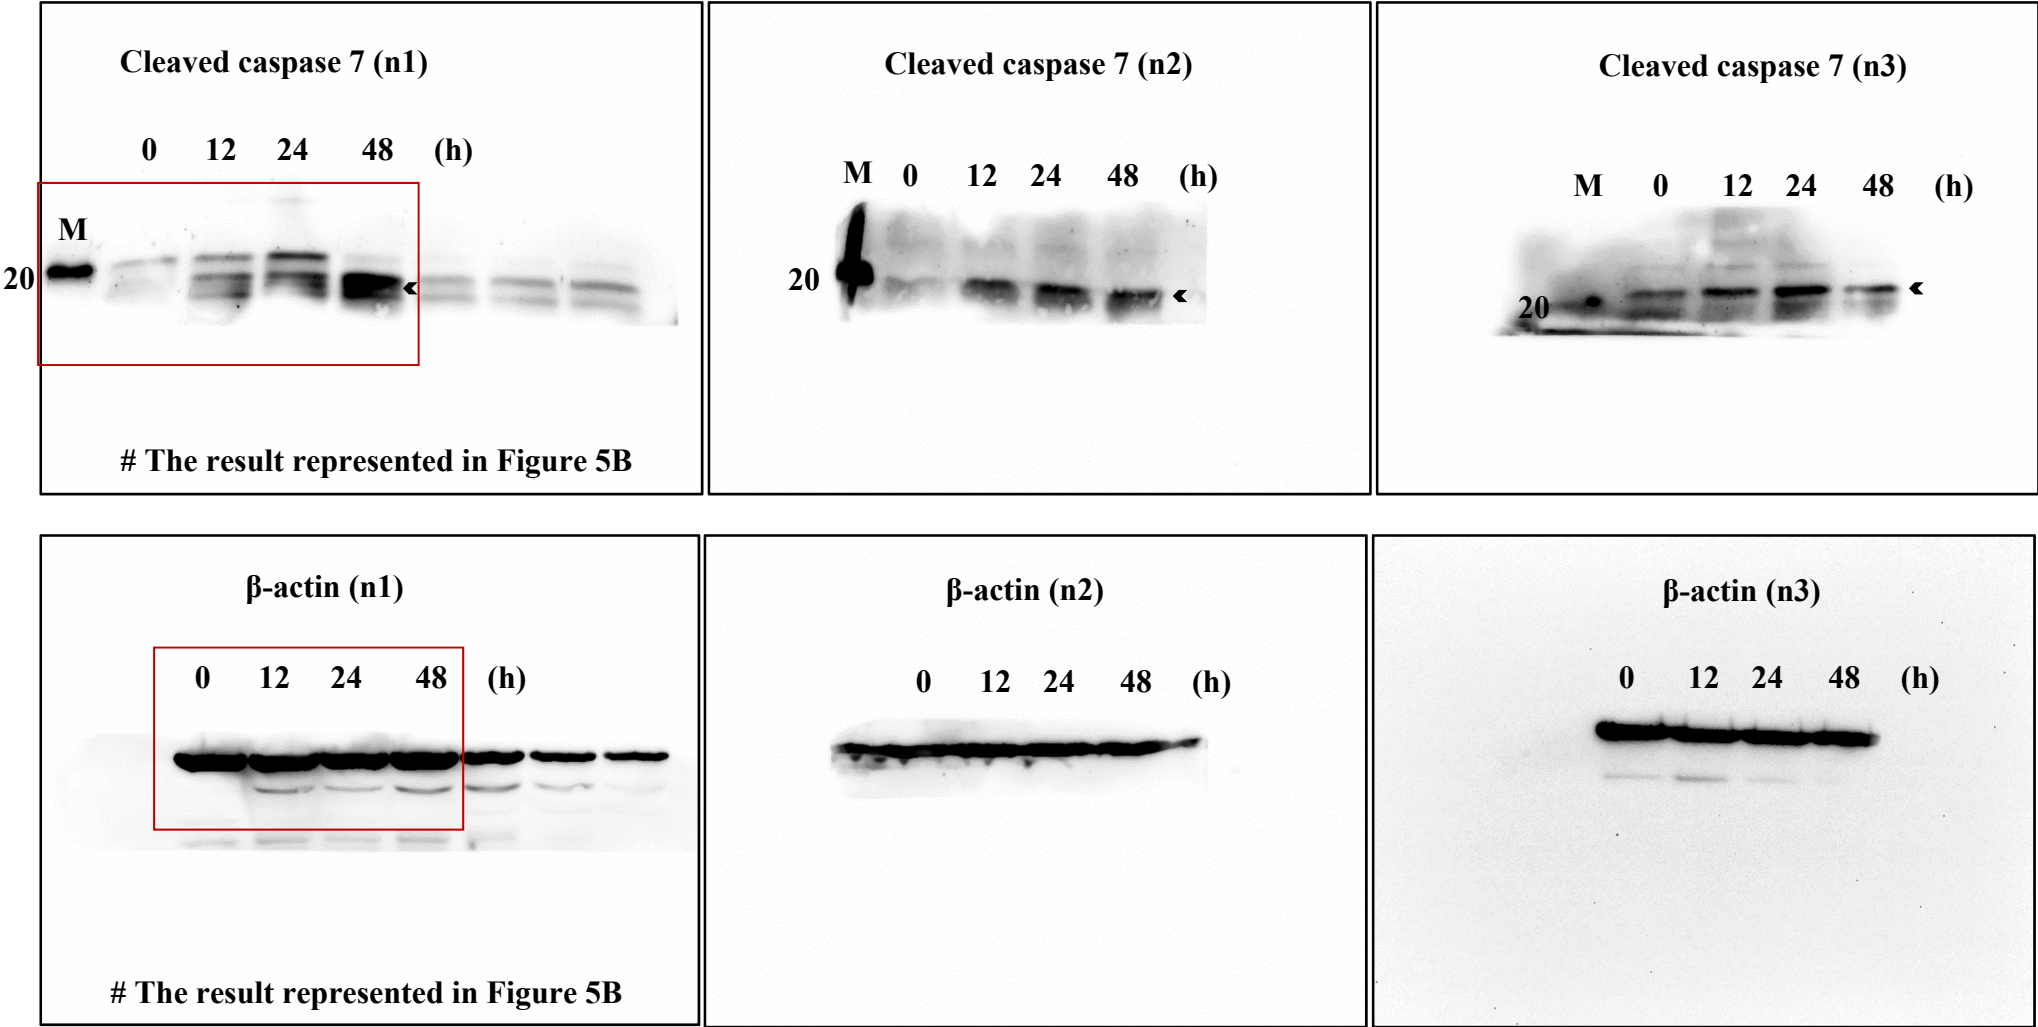

p53 (53 KDa) and β-actin (42 KDa)

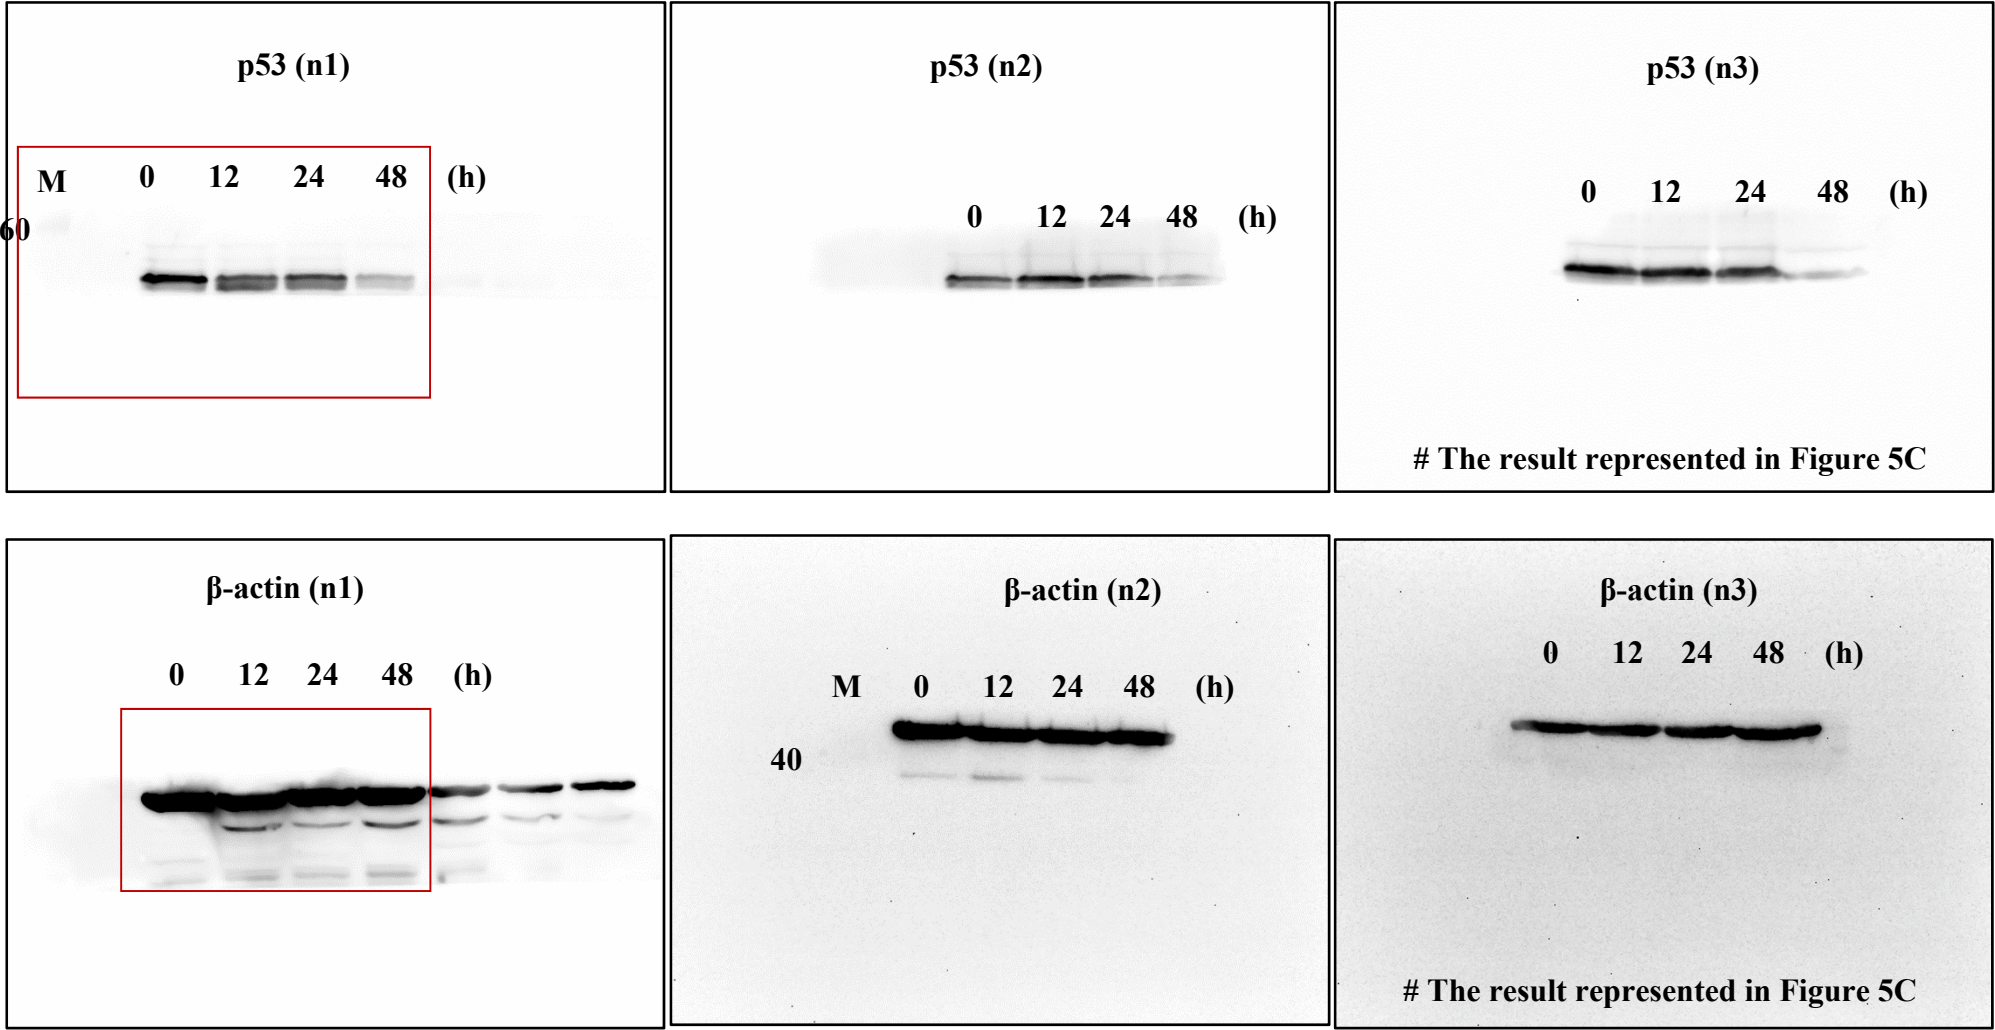

p21 (21 KDa) and  $\beta$ -actin (42 KDa)

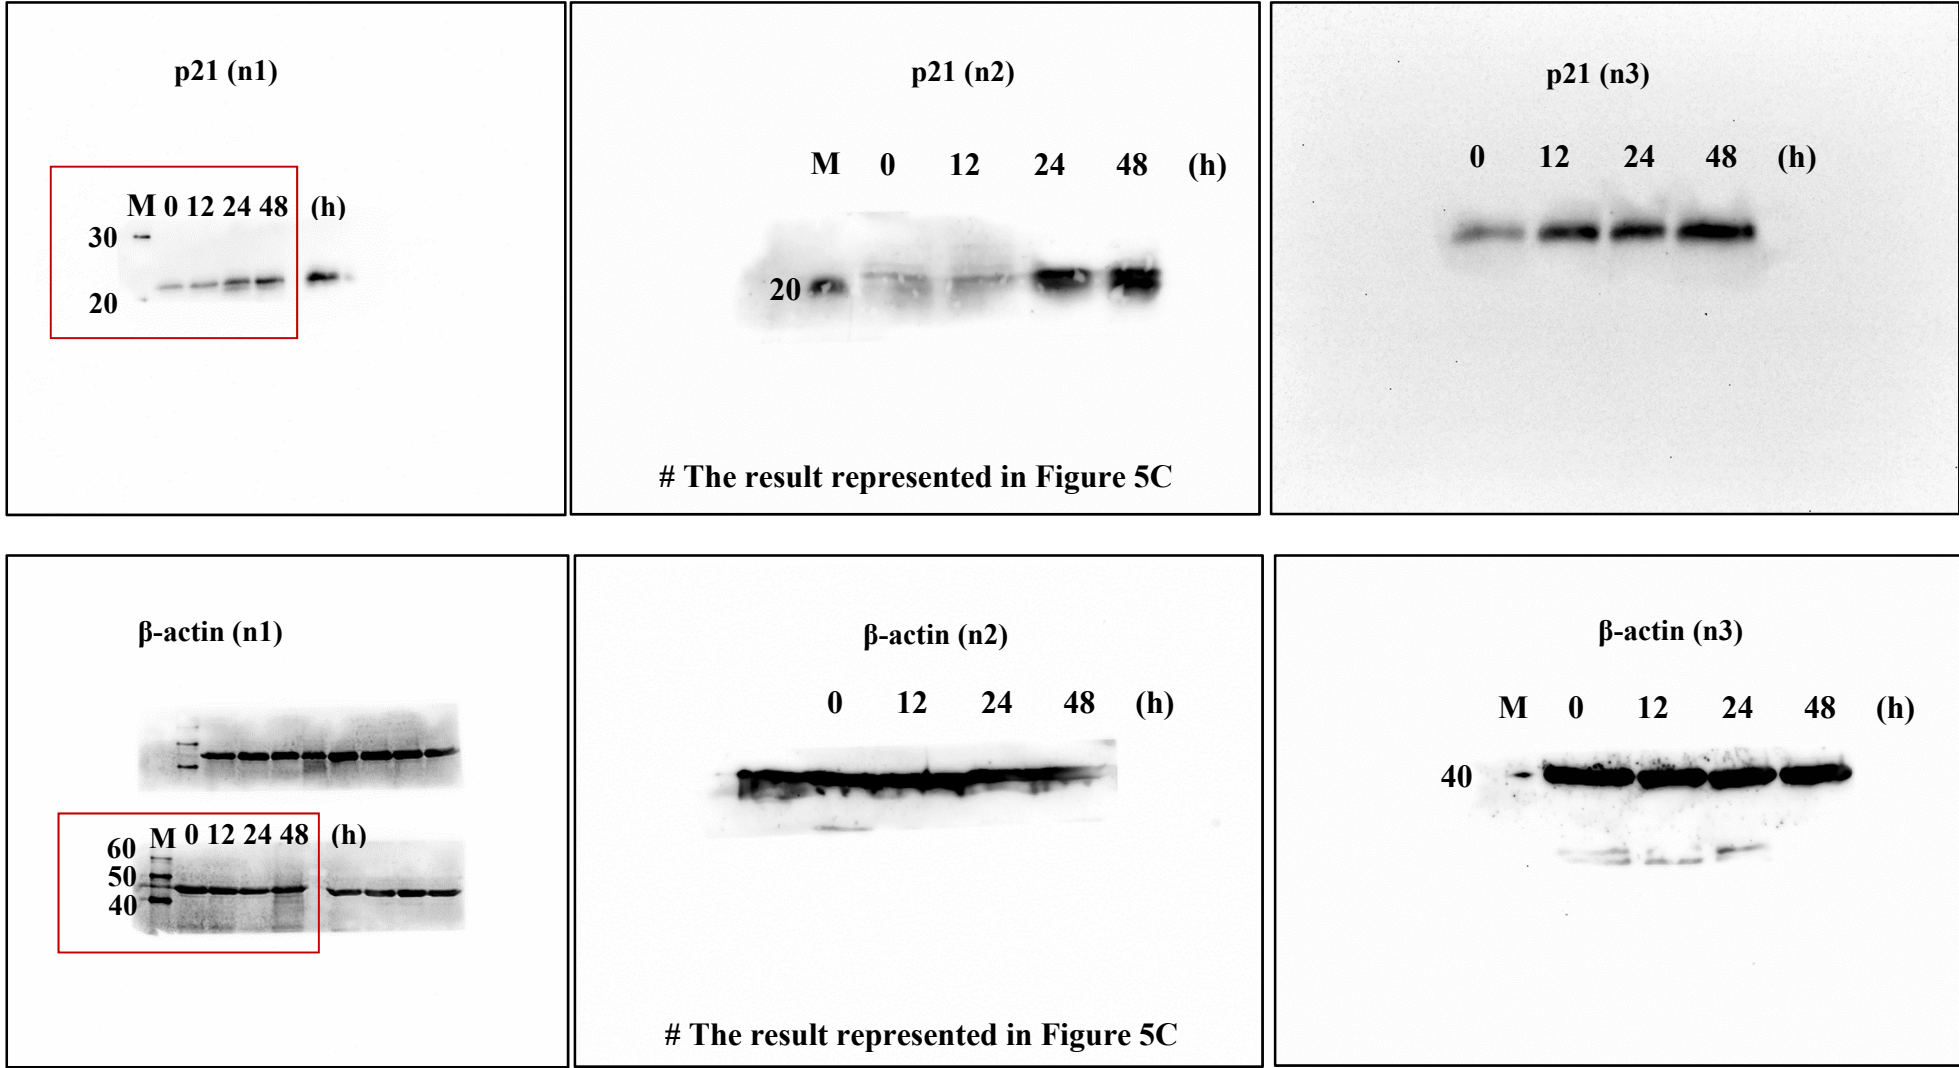

Supplement: s1 [file s1]
